Excitotoxicity induces nuclear egress of FUS/TLS

1 **FUS/TLS undergoes calcium-mediated nuclear egress during excitotoxic stress and is**  
2 **required for Gria2 mRNA processing**

3

4 Maeve Tischbein, Desiree M. Baron, Yen-Chen Lin, Katherine V. Gall, John E. Landers, Claudia  
5 Fallini, Daryl A. Bosco\*

6

7 Department of Neurology, University of Massachusetts Medical School, Worcester,  
8 Massachusetts, USA

9

10 \*Correspondence

11 Daryl A. Bosco, Ph.D.

12 University of Massachusetts Medical Center

13 Department of Neurology

14 Albert Sherman Center, AS6-1057

15 368 Plantation Dr.

16 Worcester, MA 01605

17 Daryl.Bosco@umassmed.edu

18

19 The authors declare no conflict of interest.

20

21

22

23

24

25

26

## Excitotoxicity induces nuclear egress of FUS/TLS

### 27 **Abstract**

28 Excitotoxic levels of glutamate represent a physiological stress that is strongly linked to  
29 amyotrophic lateral sclerosis (ALS) and other neurological disorders. Emerging evidence  
30 indicates a role for neurodegenerative disease linked RNA-binding proteins (RBPs) in the cellular  
31 stress response. However, the relationships between excitotoxicity, RBP function and pathology  
32 have not been explored. Here, we found that excitotoxicity induced the translocation of select  
33 ALS-linked RBPs from the nucleus to the cytoplasm within neurons. RBPs affected by  
34 excitotoxicity include TAR DNA-binding protein 43 (TDP-43) and, most robustly, fused in  
35 sarcoma/translocated in liposarcoma (FUS/TLS). FUS translocation occurs through a calcium-  
36 dependent mechanism and coincides with striking alterations in nucleocytoplasmic transport.  
37 Further, glutamate-induced upregulation of Gria2 in neurons was dependent on FUS expression,  
38 consistent with a functional role for FUS under excitotoxic stress. These findings reveal a link  
39 between prominent factors in neurodegenerative disease, namely excitotoxicity, disease-  
40 associated RBPs and nucleocytoplasmic transport.

41

### 42 **Introduction**

43 Glutamate is the major excitatory neurotransmitter in the central nervous system. Upon release  
44 from pre-synaptic terminals, relatively low levels of glutamate activate metabotropic glutamate  
45 receptors as well as the ionotropic receptors:  $\alpha$ -amino-3-hydroxy-5-methyl-4-isoxazolepropionic  
46 acid (AMPA), N-methyl-D-aspartate and kainite, for normal neurotransmission. However,  
47 excessive glutamate exposure overstimulates neurons. This causes a massive influx of calcium,  
48 which triggers an excitotoxic cascade involving oxidative damage as well as mitochondrial and  
49 ER dysfunction<sup>1</sup>. Excitotoxicity has been implicated in neuronal death and degeneration for  
50 various neurological conditions, including the fatal neurodegenerative disease amyotrophic lateral  
51 sclerosis (ALS)<sup>1-3</sup>. Pathological evidence for excitotoxicity includes elevated levels of glutamate in  
52 patient cerebrospinal fluid<sup>4,5</sup> as well as aberrant processing of the AMPA subunit that controls

## Excitotoxicity induces nuclear egress of FUS/TLS

53 calcium influx at both the transcript (Gria2) and protein (Glutamate Receptor 2; GluR2) level in  
54 patient tissue and disease models<sup>6-8</sup>. Further, ALS-causing mutations are present in D-amino acid  
55 oxidase, an enzyme that regulates the degradation of the N-methyl-D-aspartate co-agonist, D-  
56 serine<sup>9</sup>. Riluzole, the first FDA approved treatment for ALS, is thought to reduce glutamate  
57 signaling through anti-excitotoxic effects<sup>10</sup>. Despite this wealth of knowledge and profound  
58 disease relevance, the biological mechanisms underlying the cellular response to excitotoxicity  
59 have not been fully elucidated.

60

61 RNA-binding proteins (RBPs) have emerged as relevant factors in neurodegenerative disease  
62 pathogenesis, particularly in the context of ALS and the related disorder, frontotemporal dementia  
63 (FTD)<sup>11</sup>. RBPs belong to a unique class of biomolecules that undergo nucleocytoplasmic shuttling  
64 in response to various stimuli, including stress. For instance, the disease-linked RBPs fused in  
65 sarcoma/translocated in liposarcoma (FUS/TLS or FUS), TAR DNA-binding protein 43 (TDP-43)  
66 and heterogeneous nuclear ribonucleoprotein A1 (hnRNPA1) all exhibit nuclear egress during  
67 hyperosmotic stress<sup>12-14</sup>. The purpose of this translocation is unclear, and may represent a  
68 functional response to cellular stress<sup>12,15</sup>. In support of this notion, cell viability under hyperosmotic  
69 stress is compromised when FUS expression is reduced<sup>12</sup>. However, cell stress also represents  
70 a non-genetic factor that likely contributes to neurodegenerative disease pathogenesis<sup>15-17</sup>.  
71 Indeed, chronic stress may contribute to the pathological cytoplasmic accumulation of TDP-43  
72 and FUS, prevalent features of ALS and FTD<sup>16-20</sup>. For example, TDP-43 partitions into the  
73 insoluble fraction of cultured cells following oxidative stress or heat shock<sup>21,22</sup> and disease-linked  
74 RBPs have been found to aggregate *in vivo* following cerebral ischemia<sup>23</sup>. Intriguingly, the effects  
75 of stress on RBP translocation appear selective. While ER stress, oxidative stress and heat shock  
76 induce the cytoplasmic accumulation of TDP-43 and other RBPs<sup>24,25</sup>, these stressors fail to elicit  
77 a response of FUS<sup>12,26</sup>. Given the physiological relevance of excitotoxicity to neurodegenerative

## Excitotoxicity induces nuclear egress of FUS/TLS

78 disease, an important but unanswered question is whether excitotoxic stress elicits a functional  
79 and/or pathological response from disease-associated RBPs.

80

81 Here, we demonstrate that excitotoxic levels of glutamate induce the nuclear egress of several  
82 ALS- and FTD-linked RBPs, including FUS, TDP-43 and hnRNPA1 into the cytoplasm of neurons.  
83 The nucleocytoplasmic equilibrium of FUS was especially sensitive to excitotoxic stress, as FUS  
84 was found to rapidly and robustly accumulate within soma and dendrites of cortical and motor  
85 neurons under stress. Further, a glutamate-induced increase in dendritic Gria2 was dependent  
86 on FUS, consistent with a role for FUS in glutamatergic signaling during the cellular response to  
87 excitotoxic stress. Our results also revealed potentially adverse consequences of excitotoxicity,  
88 including the translocation of ALS-linked FUS variants and early signs of nucleocytoplasmic  
89 transport dysregulation. This study therefore demonstrates that excitotoxicity can trigger  
90 neurodegenerative disease-associated pathologies including cytoplasmic RBP accumulation and  
91 nucleocytoplasmic transport decline.

92

## 93 **Methods**

### 94 **Cell Culture and Stress Application**

95 HEK293-T cells were cultured as described<sup>12</sup>. Dissociated primary cortical neuron cultures were  
96 prepared using cortices from C57BL/6 embryonic day 14-15 mice. Embryos were isolated in ice-  
97 cold Hanks Buffered Saline Solution (Corning 21-023-CV, Corning, NY, USA) and the meninges  
98 removed. Cells were dissociated for 12 minutes in 0.05% Trypsin (Invitrogen 25300-054,  
99 Carlsbad, CA, USA) at 37°C, diluted in Dulbecco's Modified Eagle Medium (Invitrogen 11965118)  
100 containing 10% Fetal Bovine Serum (MilliporeSigma F4135, Burlington, MA, USA) and strained  
101 with a cell strainer before gently pelleting. Cells were then resuspended in Neurobasal media  
102 (Invitrogen 21103049), supplemented with 1% Glutamax (Invitrogen 35050-061), 1% Pen-strep  
103 (Invitrogen 15140122) and 2% B-27 (Invitrogen 0080085-SA), and plated at  $1.8 \times 10^5$  cells/mL

## Excitotoxicity induces nuclear egress of FUS/TLS

104 on poly-ornithine (final concentration of 1.5  $\mu\text{g}/\text{mL}$ ; MilliporeSigma P4957) coated plates or  
105 coverslips. Neuronal cultures were grown under standard culture conditions (37°C, 5% CO<sub>2</sub>/95%  
106 air) fed every 3-4 days by adding half volumes of supplemented neurobasal media to each  
107 well/dish, with additional half changes of media occurring every other feeding. Unless indicated,  
108 during the first feeding (DIV 2 or 3) neuron cultures were also treated with a final concentration of  
109 0.5-1 $\mu\text{M}$  Cytosine  $\beta$ -D-arabinofuranoside hydrochloride (MilliporeSigma C6645) to inhibit non-  
110 neuronal cell growth. Experiments were performed on day *in vitro* (DIV) 14-16.

111 Primary motor neurons were isolated from embryonic day 12.5 murine spinal cords as  
112 described<sup>68</sup>. Briefly, after dissociation in 0.1% trypsin (Worthington LS003707, Columbus, OH,  
113 USA) at 37°C for 12 minutes, primary motor neurons were purified using a 6% Optiprep  
114 (MilliporeSigma D1556) density gradient and plated on glass coverslips coated with 0.5g/L poly-  
115 ornithine and natural mouse laminin (Thermo Fisher 23017015, Waltham, MA, USA). Cells were  
116 grown in glia-conditioned Neurobasal medium and supplemented with 2% B27, 2% horse serum  
117 (MilliporeSigma H1270), and 10ng/ml BDNF (PeproTech 450-02, Rocky Hill, NJ, USA), GDNF  
118 (PeproTech 450-44), and CNTF (PeproTech 450-50). Primary motor neurons were treated on  
119 DIV 6-8 with Ionomycin or dimethyl sulfoxide and on DIV 8 with kainic acid. For glutamate  
120 experiments, 100mM glutamate (MilliporeSigma G5889) was freshly prepared in neurobasal  
121 media and diluted using primary neuron cultured media to achieve 0.1-10 $\mu\text{M}$  solutions. To apply  
122 stress, neuronal media was replaced with glutamate-containing primary cultured media or primary  
123 cultured media alone (glutamate-free control) for 10 minutes. After 10 minutes, treatment media  
124 was replaced with primary cultured media for 30 minutes or longer depending on the experiment  
125 prior to fixation or lysate collection. Kainic acid (Abcam ab144490) was diluted from 10 mM/ml to  
126 300 $\mu\text{M}/\text{ml}$  in primary cultured media and added to motor neurons for 10 minutes followed by a  
127 replacement with glia-conditioned media for one hour. Stock solutions of 5mM Ionomycin  
128 (MilliporeSigma I9657) or 1M sodium arsenite (MilliporeSigma 71287) prepared in prepared in  
129 dimethyl sulfoxide (Corning 25-950-CQC) or water were diluted to 10 $\mu\text{M}$  or 1 mM in primary

## Excitotoxicity induces nuclear egress of FUS/TLS

130 cultured media, respectively prior to addition to neurons for one hour. Sorbitol (MilliporeSigma  
131 S6021) was directly dissolved in primary cultured media to obtain a final concentration of 0.4M  
132 and applied to cells for one hour. For experiments in which ethylene glycol tetraacetic acid (EGTA;  
133 MilliporeSigma E3889) was added, a 100mM stock was prepared in water, diluted to 2mM in  
134 primary cultured media, and allowed to incubate for 30 minutes prior to use during the  
135 experimental time course. Translation was inhibited with 2 $\mu$ M cycloheximide (MilliporeSigma  
136 C7698). Neurons were treated with 500nm KPT-330 (Cayman Chemical 18127) dissolved in  
137 water on DIV 13 for 48 hours prior to treatment with glutamate as well as during the experimental  
138 time course.

139

## 140 **Plasmids and Cloning**

141 Human cDNA for FLAG-HA-tagged wildtype, H517Q, R521G or R495X FUS were cloned into the  
142 lentiviral vector, pLenti-CMV-TO-Puro-DEST (Addgene 670-1, Cambridge, MA, USA) using the  
143 In-Fusion HD Cloning Plus kit (Clontech 638909, Mountain View, CA). To achieve FUS  
144 knockdown, shRNA sequences<sup>48</sup> were packaged using In-Fusion HD cloning into the lentiviral  
145 backbone, CSCGW2 (a generous gift courtesy of Miguel Esteves), which contains a green  
146 fluorescent protein (GFP)-reporter expressed under a separate CMV promoter. The shRNA  
147 targeting sequences were: 5'-GCAACAAAGCTACGGACAA-3' (shFUS1) and 5'-  
148 GAGTGGAGGTTATGGTCAA-3' (shFUS2) as well as the scrambled control sequence, 5'-  
149 AATTCTCCGAACGTGTCACGT-3' (shSC). The shuttling reporter, NLS-tdTomato-NES (a  
150 generous gift courtesy of Martin Hetzer<sup>33</sup>) was cloned into the pLenti-CMV-TO-Puro-DEST vector  
151 backbone (Addgene 670-1) using Gateway BP and LR Clonase reactions (Invitrogen 11789020  
152 and 11791020, respectively). The shuttling reporter contained an NLS sequence (PPKKRKVQ)  
153 and NES sequence (LQLPPLERLTL) attached to tdTomato by a GGGG linker at the N and C  
154 termini, respectively.

## Excitotoxicity induces nuclear egress of FUS/TLS

155

### 156 **Transient Expression of ALS-Mutant FUS**

157 For transient transfection experiments, neurons were fed DIV 6 and transfected with FLAG-HA-  
158 FUS constructs on DIV 7 using NeuroMag (Oz Biosciences NM51000, Marseille, France)  
159 transfection reagents. 1.0µg DNA and 1.75µL NeuroMag (for one 24-well well; 500uL volume)  
160 were combined in an eppendorf tube and brought up to a 50µL volume using neurobasal media.  
161 The DNA mixture was allowed to incubate for 20 minutes before addition to neurons. Upon  
162 addition, neuron cultures were placed on a NeuroMag magnet plate (Oz Biosciences MF10096)  
163 within the tissue culture incubator for 15 minutes to complete transfection. Transfected neurons  
164 were collected for experimental analyses on DIV 14-16.

165

### 166 **Lentiviral Production and Application**

167 High titer lentivirus was prepared as described<sup>69</sup>. Briefly, HEK-293T cells were individually  
168 transfected using calcium phosphate with the shRNA or NLS-tdTomato-NES constructs described  
169 along with the packing plasmids: CMVdr8.91 plasmid and VSV-G. DNA constructs were  
170 prepared using by EndoFree Maxi Prep (Qiagen 12362, Germantown, MD, USA). Three hours  
171 after transfection, cell media was replaced with Opti-MEM (Invitrogen 31985070) and virus was  
172 collected in open-top Beckman tubes (Beckman Coulter 344058, Brea, CA, USA) by  
173 ultracentrifugation at 28,000 rpm in SW32Ti rotor 72 hours following transfection. Lentivirus titer  
174 was obtained by the transduction of HEK cells with serially diluted lentivirus. Upon titer  
175 determination, virus was added to DIV 6 non- cytosine β-D-arabinofuranoside hydrochloride  
176 treated neurons at an approximate titer of 1.2-1.8<sup>10</sup> tu/ml. For all transduction experiments except  
177 fluorescence *in situ* hybridization, neurons were cytosine β-D-arabinofuranoside hydrochloride  
178 treated on DIV 7. Transduced neurons were collected 9 days post-transduction (DIV 15) for  
179 analysis.

180

## Excitotoxicity induces nuclear egress of FUS/TLS

### 181 **Immunofluorescence Analysis**

182 Primary cortical and motor neurons were fixed with 4% paraformaldehyde (Fisher Scientific  
183 AAA1131336, Waltham, MA, USA) at room temperature for 15 minutes and permeabilized with  
184 0.1-0.2% Triton X-100. Cortical neuron immunofluorescence experiments were conducted as  
185 described<sup>12,26</sup> using antibodies listed in **Supplementary Table 1**. Primary motor neuron samples  
186 were blocked in 4% bovine serum albumin for 45 minutes and hybridized overnight at 4°C with  
187 primary antibodies (**Supplementary Table 1**) and AlexaFluor-conjugated secondary antibodies<sup>68</sup>.

188

### 189 **Image Acquisition and Processing**

190 Primary motor neuron images were imaged using a widefield fluorescence microscope (Nikon  
191 TiE, Melville, NY, USA) equipped with a cooled CMOS camera (Andor, South Windsor, CT, USA).  
192 Primary motor neurons images were acquired as Z-stacks (0.2µm step size) using a 60x lens. As  
193 indicated, fixed primary cortical neurons were imaged using a Leica TCS SP5 II laser scanning  
194 confocal (Leica Microsystems, Buffalo Grove, IL, USA) or Leica DMI6000B microscope as  
195 described<sup>12</sup>. For confocal images of whole cells, 12-bit stacks ( $\Delta z = 0.25\mu\text{M}$  steps, zoom = 3x, n  
196 = 23-30 planes) were acquired at 40x with a pixel size of 126nm (1024x1024 pixels; 1000Hz). For  
197 dendrites, 12-bit stacks ( $\Delta z = 0.08\mu\text{M}$  steps, zoom = 3x, n = 40-50 planes) were acquired at 63x  
198 using a pixel size of 80nm (1024x1024 pixels; 1000Hz). For fluorescence *in situ* hybridization  
199 (FISH), mFUS and somatic puromycin analyses, widefield stacks of the entire cell were acquired  
200 ( $z=0.2-.25\mu\text{m}$ ) and deconvolved using the LAS AF One Software Blind algorithm (10 iterations).  
201 All neuron images were analyzed using MetaMorph software (Molecular Devices Inc., San Jose,  
202 CA, USA). The background and shading of stacks were corrected as described<sup>26</sup>. Sum or  
203 maximum projections were created from corrected stacks for downstream analyses.

204 For the quantification of cytoplasmic to nuclear (C:N) ratios, a 20x20 pixel region was  
205 applied to the nucleus and perinuclear area in the soma for each cell (visualized by DAPI and  
206 MAP2, NeuN or SMI-32 respectively) as well as an area within each image that contained no cells



## Excitotoxicity induces nuclear egress of FUS/TLS

207 (representing background fluorescence). Using MetaMorph, the integrated intensity for the signal  
208 of interest was obtained for each region and a ratio of the cytoplasmic:nuclear signal was then  
209 generated following subtraction of background signal. For each experiment, the statistical  
210 comparison of C:N ratios with or without excitotoxic stress was completed using average C:N  
211 ratios collected from  $\geq$ three independent, biological experiments. For the analysis of FUS levels  
212 in neuronal dendrites, Microtubule-associated protein 2 (MAP2) was used visualize neuronal  
213 dendrites and create a dendritic mask using MetaMorph. Using the MAP2-defined mask, the  
214 integrated intensity of FUS staining was obtained and used to quantify the relative amount of FUS  
215 staining in dendrites. For the quantification of total neurons and neurons exhibiting FUS  
216 translocation,  $\geq$ 10 fields of view were imaged at 40x for each condition tested. As indicated by  
217 MAP2 or neuronal nuclei (NeuN) staining, neurons were quantified from images with computer  
218 assistance from the 'Cell Count' feature in MetaMorph. To assess the percent neurons with  
219 protein translocation, cells were scored for the presence of cytoplasmic FUS and divided by the  
220 total neuron number to generate the percent population exhibiting a response.

221

## 222 **Puromycin Analysis**

223 Based on previously described experiments<sup>39</sup>, 4mM stocks of puromycin (Invitrogen, A11138-03)  
224 were prepared in water. Neurons were treated with glutamate as described, except that a final  
225 concentration of 2 $\mu$ M puromycin was added to the primary cultured media during the last 15  
226 minutes of the 'washout' period. As a positive control of translational inhibition, 100  $\mu$ g/ml  
227 cycloheximide (MilliporeSigma C7698) throughout the experimental time course. Neurons were  
228 then analyzed by Western or Immunofluorescence using an anti-puromycin antibody  
229 (**Supplementary Table 1**). For the analysis of puromycin immunostaining upon FUS knockdown,  
230 a 20x20 pixel region was placed in the soma of GFP-positive cells. Using MetaMorph, the

## Excitotoxicity induces nuclear egress of FUS/TLS

231 integrated intensity of this region was obtained and used to quantify relative puromycin levels as  
232 described.

233

### 234 **Fluorescence *in situ* Hybridization (FISH) Analysis**

235 Non-cytosine  $\beta$ -D-arabinofuranoside hydrochloride treated neurons were plated on coverslips and  
236 transduced with shFUS or shSC-expressing lentivirus on DIV 6 and harvested on DIV 15.  
237 Following stress application, neurons were fixed with fresh 4% paraformaldehyde (Fisher  
238 Scientific F79-500) diluted in RNase free water (Corning 46-000-CM) for 30 minutes at ambient  
239 temperature. FISH labeling was completed using a QuantiGene ViewRNA ISH Cell Assay Kit  
240 (Affymetrix QVC0001, Santa Clara, CA, USA) according to the manufacturer's instructions. One  
241 exception to the protocol was that samples were dehydrated after fixation with two-minute  
242 incubations in 50%, 70%, and 100% ethanol at ambient temperature followed by a second  
243 addition of 100% ethanol and stored at  $-20^{\circ}\text{C}$  for five days before processing. The Gria2-Cy3  
244 probe was designed and tested for specificity by Affymetrix. For post-FISH immunofluorescence  
245 staining, after probe labeling, coverslips were washed in phosphate buffered saline for five  
246 minutes and then blocked and processed for immunofluorescence as described<sup>70</sup>. Coverslips  
247 were probed with MAP2 and GFP to visualize neurons and transduced cells, respectively. For  
248 analysis, neurons with at least 2 dendrites of  $50+ \mu\text{m}$  lengths that did not excessively overlap with  
249 other cells were selected. Max projections of the imaged z-stacks were analyzed using  
250 MetaMorph software. For each neuron analyzed, 2-3 dendrites and the cell body were assessed  
251 for their area and the number of mRNA puncta present. Average dendrite data were reported for  
252 each cell and 10 cells were analyzed per construct/condition. Images were prepared for  
253 visualization in figures based upon methods previously described<sup>71</sup>.

254

### 255 **Lactate Dehydrogenase (LDH) Analysis**

## Excitotoxicity induces nuclear egress of FUS/TLS

256 Neuron toxicity to glutamate was analyzed by the LDH assay using the CytoToxx 96 Non-  
257 Radioactive Cytotoxicity Assay kit (Promega G1782, Madison, WI, USA).

258

### 259 **Western Analysis**

260 Neurons were treated, washed twice with phosphate buffered saline and lysed using RIPA buffer  
261 (Boston BioProducts BP-115-500, Ashland, MA, USA) supplemented with protease (Roche  
262 11836170001, Basel, Switzerland) and phosphatase inhibitors (Roche 4906837001). Lysates  
263 were centrifuged at 13,500 rpm for 15 minutes, after which the supernatant was collected and its  
264 protein concentration determined using a bicinchoninic acid assay (Thermo Scientific Pierce  
265 23227, Rockford, IL, USA). Lysates were subsequently used for Western and densitometry  
266 analysis as described<sup>48</sup>. Gels were loaded with 8-20µg lysate and GAPDH was used as a loading  
267 standard to determine relative protein levels. Primary antibodies used for analysis are described  
268 in **Supplementary Table 1**; LI-COR (Lincoln, NE, USA) secondary antibodies were used as  
269 described<sup>48</sup>.

270

### 271 **Results**

#### 272 **Excitotoxic levels of glutamate shift the nucleocytoplasmic equilibrium of disease-linked** 273 **RNA binding proteins.**

274 To investigate a potential relationship between excitotoxicity and neurodegenerative disease-  
275 linked RBPs, we first examined whether excitotoxicity affects the nucleocytoplasmic equilibrium  
276 of a panel of proteins including FUS, TDP-43, hnRNP A1 and TATA-Binding Protein-Associated  
277 Factor 15 (TAF15). All four proteins have been linked to ALS<sup>11</sup> and FUS, TDP-43 and TAF15 are  
278 also associated with FTD<sup>27</sup>. DIV 14-16 primary cortical neurons were bath treated with excitotoxic  
279 and physiologically relevant levels of glutamate<sup>4,28</sup> (10µM; hereon referred to as Glu<sup>excito</sup>) for 10  
280 minutes followed by a 30-minute washout period (**Fig. 1A**). Immunofluorescence was then used  
281 to assess the effect of Glu<sup>excito</sup> on the cytoplasmic to nuclear (C:N) ratio of the endogenous RBPs

## Excitotoxicity induces nuclear egress of FUS/TLS

282 **(Fig. 1B-I)**. Strikingly, the FUS C:N ratio significantly increased ~15-fold from  $0.04 \pm 0.05$  to  $0.6 \pm 0.3$   
283 in response to  $\text{Glu}^{\text{excito}}$  **(Fig. 1B,F)**. This increase is likely due to a rapid egress of FUS from the  
284 nucleus into the cytoplasm, as a Western analysis revealed total FUS protein levels are  
285 unchanged before and after stress **(Fig. S1)**.  $\text{Glu}^{\text{excito}}$  likewise induced a significant increase in the  
286 C:N ratio of TDP-43 **(Fig. 1C,G)** and hnRNPA1 **(Fig. 1D,H)** without altering protein expression  
287 **(Fig. S1)**. Conversely,  $\text{Glu}^{\text{excito}}$  did not significantly alter the C:N ratio **(Fig. 1E,I)** or protein  
288 expression **(Fig. S1)** of TAF15.

289

290 In light of the robust response of FUS to  $\text{Glu}^{\text{excito}}$ , we focused our attention on the properties of  
291 FUS translocation in more detail. First, endogenous FUS translocation in response to  $\text{Glu}^{\text{excito}}$  was  
292 confirmed using a panel of different anti-FUS antibodies **(Fig. S2 A,B)**. We then examined the  
293 relationship between FUS translocation and glutamate concentration. With  $10 \mu\text{M}$  glutamate, the  
294 vast majority of neurons ( $91.3 \pm 11.5\%$ ) exhibited FUS egress **(Fig. 2A,B)**, whereas  $<5\%$  neurons  
295 exhibited translocation at  $\leq 1 \mu\text{M}$ , revealing a dependence of FUS localization on glutamate  
296 concentration **(Fig. 2B)**. Within the time course of our experiment **(Fig. 1A)**, a significant  
297 accumulation of endogenous FUS was also detected throughout MAP2-positive dendrites **(Fig.**  
298 **2C,D)**.

299

300 Given the toxicity of  $\text{Glu}^{\text{excito}}$  on neurons<sup>28</sup>, we interrogated whether the rapid and robust  
301 accumulation of FUS outside the nucleus was simply a consequence of cell death and/or loss of  
302 nuclear envelope integrity. The extent of cell death was assessed using the LDH cytotoxicity  
303 assay, which detects the activity of LDH upon its release into the media from dead or dying cells.  
304 In contrast to neurons treated with lysis buffer, there was no evidence of cell death for neurons  
305 treated with  $\text{Glu}^{\text{excito}}$  **(Fig. 2E)**. Further, Lamin A/C staining revealed an intact nuclear envelope in  
306 neurons exposed to  $\text{Glu}^{\text{excito}}$  **(Fig. 2F)**. These observations support the premise that cytoplasmic

## Excitotoxicity induces nuclear egress of FUS/TLS

307 FUS accumulation represents a cellular response to Glu<sup>excito</sup>, rather than a non-specific  
308 consequence of cell death. Moreover, RBP translocation appears selective, as TAF15 (**Fig. 1E,I**)  
309 and the cytoplasmic protein, fragile X mental retardation protein (FMRP; **Fig. S2C**), did not  
310 change localization following excitotoxic insult. It is noteworthy that Glu<sup>excito</sup> affects neuron  
311 morphology at 30 minutes (**Fig. 1A**), potentially indicative of a stressed state. Anti-MAP2 staining  
312 revealed a rearrangement of the cytoskeleton; staining was more pronounced around the nucleus  
313 and indicated dendritic fragmentation (**Fig. 1,2**). Likewise, the nuclear lamina appeared thickened  
314 and the size of nuclei smaller in stressed neurons (**Fig. 2F**). As expected, neurons exposed to  
315 excitotoxic stimuli (10  $\mu$ M, but not 1  $\mu$ M glutamate) eventually undergo cell death within 24 hours  
316 of the initial insult<sup>28</sup> (**Fig. S2D,E**).

317

### 318 **Excitotoxic stress induces egress of predominately nuclear ALS-linked FUS variants.**

319 The majority of ALS-linked mutations are located within the nuclear localization sequence (NLS)  
320 and, as such, these variants exhibit varying degrees of cytoplasmic mislocalization<sup>15</sup>. Given that  
321 both ALS-mutations and Glu<sup>excito</sup> influence the subcellular localization of FUS, we investigated the  
322 relationship between these two factors. A series of FLAG-HA-tagged FUS variants were  
323 transiently expressed in neurons and the C:N ratio of exogenous FUS was determined in the  
324 absence and presence of Glu<sup>excito</sup> (**Fig. 3**). In addition to wildtype (WT) FUS, we examined:  
325 H517Q, the only autosomal recessive FUS mutation associated with ALS<sup>16</sup>; R521G, representing  
326 a mutational 'hot spot' for ALS-FUS<sup>29</sup>; and R495X, a particularly aggressive ALS-linked  
327 mutation<sup>26</sup>. The degree of FUS mislocalization has been reported as H517Q $\leq$ R521G $\ll$ R495X  
328 under basal conditions<sup>26</sup>, consistent with what was observed here (**Fig. 3**). As expected, FLAG-  
329 HA-FUS WT exhibited a significant translocation to the cytoplasm in response to Glu<sup>excito</sup>.  
330 Similarly, the C:N ratio of FLAG-HA-FUS H517Q and R521G, both of which exhibit a  
331 predominately nuclear localization under basal conditions (**Fig. 3** and <sup>16,26</sup>), also increased  
332 significantly with Glu<sup>excito</sup>. The C:N ratio of FLAG-HA-FUS R495X, which already exhibits a high

## Excitotoxicity induces nuclear egress of FUS/TLS

333 degree of cytoplasmic localization under basal conditions (**Fig. 3** and <sup>26</sup>), did not change with  
334 Glu<sup>excito</sup>. This observation may be indicative of a ‘ceiling effect’, in that the normal  
335 nucleocytoplasmic distribution of R495X-FUS is equivalent to that of ‘maximally’ redistributed  
336 endogenous FUS following acute excitotoxic insult.

337

### 338 **Nucleocytoplasmic transport is disrupted in response to excitotoxic stress.**

339 To understand the mechanism(s) underlying endogenous FUS egress in response to Glu<sup>excito</sup>, we  
340 began with an examination of nucleocytoplasmic transport factors. FUS contains two predicted  
341 chromosome region maintenance 1 (CRM1)-dependent nuclear export sequences (NES) within  
342 the RNA-recognition motif<sup>30</sup>. CRM1 is a major protein export factor, although whether this receptor  
343 controls nuclear FUS export is controversial<sup>30,31</sup>. To determine if excitotoxic FUS egress is CRM1-  
344 dependent, we pretreated neurons with the CRM1 inhibitor, KPT-330, prior to treatment with  
345 Glu<sup>excito</sup><sup>32</sup>. The CRM1-dependent NLS-tdTomato-NES shuttling reporter was used as a positive  
346 control<sup>33</sup>. As expected, NLS-tdTomato-NES exhibited both a nuclear and cytoplasmic localization  
347 under basal conditions (Glu<sup>-</sup>, -KPT), whereas the localization of this reporter was significantly  
348 restricted to the nucleus in the presence of KPT-330 (Glu<sup>-</sup>, +KPT; **Fig. 4A,B**). In contrast, KPT-  
349 330 had no effect on nuclear FUS egress in response to Glu<sup>excito</sup> (Glu<sup>excito</sup> +/-KPT; **Fig. 4A,C**).  
350 Surprisingly, KPT-330 also failed to fully restrict NLS-tdTomato-NES to the nucleus under  
351 conditions of Glu<sup>excito</sup> (**Fig. 4A,B**). Although there was a significant decrease in the percentage of  
352 cells with cytoplasmic NLS-tdTomato-NES in the presence of both KPT-330 and Glu<sup>excito</sup>  
353 (60.1±8.0%) compared to Glu<sup>excito</sup> alone (98.3±2.6, p<0.0001), these results suggest that CRM1-  
354 mediated export is dysregulated under conditions of stress (**Fig. 4B**). Moreover, while  
355 endogenous CRM1 predominately localizes to the nucleus, Glu<sup>excito</sup> induced a significant increase  
356 the number of neurons exhibiting a cytoplasmic localization of this protein (**Fig. 4D,E**). This finding  
357 prompted us to examine another critical nucleocytoplasmic transport factor, Ras-related nuclear  
358 protein (Ran). Ran is a GTPase that shuttles between the nucleus and cytoplasm and, depending

## Excitotoxicity induces nuclear egress of FUS/TLS

359 on its nucleotide bound state, facilitates nuclear export or import<sup>34</sup>. Indeed, Glu<sup>excito</sup> also induced  
360 a significant change in the nucleocytoplasmic distribution of Ran (**Fig. 4F,G**). Taken together,  
361 Glu<sup>excito</sup> caused the redistribution of critical transport factors and attenuated the effects of KPT-  
362 330 on CRM1 export.

363

### 364 **Excitotoxic FUS egress is calcium dependent.**

365 Knowing that calcium influx is a critical component of excitotoxicity<sup>1</sup>, we sought to determine  
366 whether this signaling molecule is required for the response of FUS to excitotoxicity. To this end,  
367 the calcium chelator, EGTA, was included in the neuronal media during the experimental time  
368 course. Indeed, EGTA completely prevented Glu<sup>excito</sup>-induced FUS egress (**Fig. 5A,B**). Further  
369 application of the calcium ionophore, Ionomycin, was sufficient to induce FUS translocation in the  
370 vast majority (89.0±5.6%) of neurons (**Fig. 5C,D**). In light of our previous finding that hyperosmotic  
371 stress induces nuclear FUS egress<sup>12</sup>, we wondered whether calcium also mediated this response.  
372 In contrast to Glu<sup>excito</sup>, there was no effect of EGTA on FUS egress in neurons treated with  
373 hyperosmotic levels of sorbitol (**Fig. 5E,F**), indicative of distinct mechanisms for FUS egress  
374 under these stress conditions.

375

376 Next, we investigated the effect of calcium on FUS localization in primary motor neurons, the  
377 neuronal cell type predominately affected in ALS. Consistent with cortical neurons, the application  
378 of Ionomycin to DIV 6-8 motor neurons shifted the nucleocytoplasmic equilibrium of FUS towards  
379 the cytoplasm (**Fig. 5G,H**). Application of the glutamatergic agonist, kainic acid, to motor neurons  
380 also induced a significant increase in the C:N ratio of FUS (**Fig. 5I,J**). Kainic acid is known to  
381 induce motor neuron excitotoxicity<sup>35</sup> and was used here to avoid confounding effects of glutamate  
382 uptake by astroglia present in the motor neuron cultures<sup>36</sup>. We noted a relatively wide range in  
383 the C:N ratio of FUS in kainic acid treated neurons; a sub-population of cells exhibited near

## Excitotoxicity induces nuclear egress of FUS/TLS

384 complete egress of nuclear FUS (**Fig. 5I,J**), a result that was not observed in cortical neurons  
385 treated with glutamate.

386

387 **Excitotoxic stress induces translational repression independent of FUS expression and**  
388 **stress granule formation.**

389 Translational repression and stress granule formation are common cellular responses to  
390 stress<sup>37,38</sup>. Given that cytoplasmic forms of FUS have been linked to both translational  
391 regulation<sup>39,40</sup> and stress granule formation<sup>12,26,41,42</sup>, we investigated both of these processes  
392 during excitotoxic stress. In contrast to neurons treated with sodium arsenite, a stressor known to  
393 induce the formation of stress granules<sup>26</sup>, Glu<sup>excito</sup> did not induce the formation of Ras GTPase-  
394 activating protein-binding protein 1 (G3BP1)-positive stress granules in neurons (**Fig. S3A**). Next,  
395 we assessed protein translation by pulse labeling neurons with puromycin, a small molecule that  
396 incorporates into elongating peptides<sup>43</sup> (**Fig. 6A**). Detection of puromycin by immunofluorescence  
397 revealed a near-perfect correlation between neurons exhibiting FUS translocation and  
398 translational repression; all neurons with translocated FUS were puromycin-reduced, and vice  
399 versa (**Fig. 6B**). The degree of translational repression induced by Glu<sup>excito</sup> was comparable to  
400 treatment with the translational inhibitor, cycloheximide (**Fig. 6A-D**), and did not promote FUS  
401 egress (**Fig. 6B**). Global translational repression was confirmed by a Western analysis (**Fig. 6C,**  
402 **D**), and was found to occur independently of eukaryotic translation initiation factor 2 alpha  
403 (EIF2 $\alpha$ )-phosphorylation (**Fig. S3B,C**)<sup>38</sup>. However, endogenous FUS does not appear to play a  
404 vital role in regulating global translation, as puromycin levels were unaffected by FUS knockdown,  
405 both in the presence and absence of Glu<sup>excito</sup> (**Fig. S3D-I**).

406

407 **Gria2 mRNA is elevated in dendrites following excitotoxic insult in a FUS-dependent**  
408 **manner.**



## Excitotoxicity induces nuclear egress of FUS/TLS

409 RBPs such as FUS play crucial roles in mRNA processing<sup>15</sup>. Although FUS expression did not  
410 affect global protein synthesis (**Fig. S3E-I**), this analysis would not necessarily detect differences  
411 in the translation of specific transcripts, especially those targeted to dendrites for local  
412 translation<sup>44</sup>. Therefore, we investigated whether FUS modulates mRNA metabolism following  
413 excitotoxic insult and focused on Gria2, a transcript that is directly bound by FUS<sup>45</sup>. Gria2 mRNA  
414 encodes the GluR2 protein subunit of the AMPA receptor and has been implicated in calcium  
415 dyshomeostasis in both ALS<sup>1</sup> and FTD<sup>46</sup>. Following depolarization, dendritic GluR2 expression is  
416 enhanced<sup>47</sup>. Under excitotoxic conditions, we uncovered a significant increase in Gria2 transcript  
417 density by FISH in both the soma and dendrites of cortical neurons (**Fig. 7, S4A-C**). To examine  
418 whether this increase in Gria2 mRNA density is FUS dependent, endogenous FUS levels were  
419 knocked down using two shRNAs targeting distinct sequences within FUS<sup>48</sup> (**Fig. S3D-F**) prior to  
420 excitotoxic treatment (**Fig. 7**). Consistent with previous findings<sup>45</sup>, reduced FUS expression did  
421 not have a significant effect on the levels of Gria2 under basal conditions, as determined by FISH  
422 within the neuronal soma and dendrites (**Fig. 7B,C**). In contrast, Glu<sup>excito</sup>-induced changes to  
423 Gria2 were significantly attenuated upon FUS knockdown. Dendritic expression of Gria2 was  
424 particularly sensitive to FUS levels under Glu<sup>excito</sup>, as knockdown of FUS restored dendritic Gria2  
425 levels to baseline (**Fig. 7C, D**). Within the time course of the analysis, we were unable to detect  
426 significant changes in GluR2 protein levels by Western blot analysis of whole cell lysates (**Fig.**  
427 **S4D,E**). Taken together, these data show that FUS expression is required for Glu<sup>excito</sup>-induced  
428 changes to Gria2 processing in neuronal dendrites (**Fig. 8**).

429

## 430 Discussion

431 This study uncovered an association between disease-linked RBPs and excitotoxicity, a stress  
432 that has particularly profound effects on the nucleocytoplasmic distribution of FUS in both cortical  
433 (**Fig. 1, 2**) and motor neurons (**Fig. 5**). There is a compelling body of evidence linking glutamate-  
434 induced excitotoxicity to neurodegenerative diseases, including ALS<sup>1-3</sup>. For instance, elevated

## Excitotoxicity induces nuclear egress of FUS/TLS

435 levels of glutamate were detected in biological samples from ALS patients<sup>5,49,50</sup>. Cell death caused  
436 by glutamate and calcium dysregulation has also been documented in multiple animal and cellular  
437 models<sup>1,2,5-7,51</sup>. The outcomes of this study shed new light on the excitotoxicity cascade and  
438 implicate, for the first time, a role for the ALS/FTD-linked protein FUS in this process.

439

440 Our results are consistent with a functional role for FUS in response to glutamatergic signaling<sup>52</sup>  
441 rather than a non-specific effect of cell death. First, FUS egress precedes cell death (**Fig. 2**).  
442 Second, there is selectivity with respect to proteins that undergo a change in cellular localization;  
443 the response of FUS is particularly robust compared to the other proteins assessed in this study  
444 (**Fig. 1, S2C, S3A**). Third, the effects of excitotoxicity on Gria2 depend on FUS expression (**Fig.**  
445 **7**). FUS binds Gria2 mRNA within introns and the 3' untranslated region, and Gria2 splicing is  
446 effected by FUS expression under basal conditions<sup>45</sup>. Under Glu<sup>excito</sup>, Gria2 density was enhanced  
447 in neuronal dendrites in a FUS-dependent manner (**Fig. 7**). Gria2 encodes the GluR2 protein  
448 subunit of the AMPA receptor. Normally, GluR2 is post-transcriptionally edited and GluR2-  
449 containing AMPA receptors are calcium impermeable. As such, the calcium permeability of AMPA  
450 receptors and the susceptibility of neurons to excitotoxicity is dependent on GluR2<sup>1,8</sup>. We  
451 speculate that the enhanced dendritic density of Gria2 may serve to increase the number of  
452 calcium impermeable (GluR2-containing) AMPA receptors and thereby offset calcium influx  
453 caused by existing calcium permeable (GluR2-lacking) receptors (**Fig. 8**). In ALS, this process  
454 could be compromised as a result of dysregulated Gria2 editing and/or GluR2 expression<sup>8,53</sup>,  
455 particularly in motor neurons that rely heavily on AMPA receptor signaling<sup>1,2</sup>. The effect of FUS  
456 on dendritic Gria2 density following Glu<sup>excito</sup> (**Fig. 7B,C**) is novel and consistent with a role of FUS  
457 in modulating Gria2 processing. The exact nature of this role however remains to be fully  
458 elucidated, and could involve a function of FUS in Gria2 splicing<sup>45</sup>, transport<sup>54</sup>, and/or or  
459 stabilization<sup>55,56</sup>.

460

## Excitotoxicity induces nuclear egress of FUS/TLS

461 While investigating the mechanism(s) underlying excitotoxic FUS egress, we uncovered striking  
462 changes to the CRM1 nuclear export pathway (**Fig. 4**). Inhibition of CRM1-mediated export by  
463 KPT-330 failed to restrict both NLS-tdTomato-NES (**Fig. 4A,B**) and FUS (**Fig. 4A,C**) within the  
464 nucleus under Glu<sup>excito</sup>. Further, CRM1 localization was significantly shifted towards the cytoplasm  
465 (**Fig. 4D,E**). Despite these changes, nucleocytoplasmic transport was not completely  
466 dysregulated, as a partial inhibitory effect of KPT-330 on the shuttling reporter was observed (**Fig.**  
467 **4B**). Our KPT-330 studies suggest that Glu<sup>excito</sup>-induced FUS egress occurs through a mechanism  
468 other than active CRM1 export, and could entail passive diffusion<sup>30</sup> or alternative transport  
469 factors<sup>57</sup>. Selectivity of RBP egress following Glu<sup>excito</sup> may stem from differences in  
470 nucleocytoplasmic shuttling dynamics, which are influenced by multiple factors including binding  
471 interactions and post-translational modifications<sup>58</sup>. An interesting area of future study could be to  
472 elucidate these factors and determine whether they are modulated by stress.

473  
474 Alterations to CRM1 and Ran (**Fig. 4**) under Glu<sup>excito</sup> may represent early signs of  
475 nucleocytoplasmic transport decline. Indeed, previous studies show that various forms of stress  
476 (e.g., excessive calcium influx, oxidative, and hyperosmotic stress) cause damage to nuclear  
477 pores and impair nucleocytoplasmic transport<sup>59-63</sup>. Mice deficient in key astroglial glutamate  
478 transporters exhibited both nuclear pore degradation and motor neuron degeneration<sup>64</sup>.  
479 Moreover, the nucleocytoplasmic transport pathway has been implicated in age-related  
480 neurodegeneration, particularly in the context of ALS and FTD<sup>65</sup>. While most ALS/FTD-associated  
481 studies have focused on the role of mutant proteins in dysregulating nucleocytoplasmic  
482 transport<sup>34,65</sup>, ALS/FTD-associated forms of cellular stress (e.g., excitotoxicity) may also  
483 contribute to nucleocytoplasmic transport defects in both inherited and sporadic forms of disease.  
484 In fact, nucleocytoplasmic transport is an emerging area of therapeutic development and the  
485 CRM1 inhibitor KPT-350 is advancing towards ALS clinical trials. Partial inhibition of CRM1 is  
486 expected to offset defects in nuclear import. CRM1 inhibitors have had a therapeutic effect in

## Excitotoxicity induces nuclear egress of FUS/TLS

487 some<sup>65,66</sup>, but not all<sup>57,64</sup>, models of neurodegeneration. Collectively, the available data, including  
488 our own (**Fig. 4**), support CRM1-mediated nucleocytoplasmic transport as a viable therapeutic  
489 target for neurodegenerative disorders. However, a combination therapy addressing additional  
490 effects of stress-induced nuclear pore degradation (i.e., calpain inhibitors<sup>64</sup>) may be required for  
491 a significant therapeutic outcome.

492

493 The calcium-mediated response of FUS to Glu<sup>excito</sup> has additional implications for  
494 neurodegeneration, including cases of FUS-mediated ALS. For instance, motor neurons derived  
495 from human ALS-FUS induced pluripotent stem cells are intrinsically hyperexcitable<sup>67</sup>. Further,  
496 the effects of ALS-linked FUS on calcium-mediated motor neuron toxicity is exacerbated by  
497 expression of the mutant protein in astrocytes<sup>51,8</sup>. Most ALS-linked FUS mutations are located  
498 within the NLS<sup>29</sup> and induce a shift in the nucleocytoplasmic equilibrium of the protein toward the  
499 cytoplasm, where it is believed to exert a gain of toxic function<sup>26,68</sup> (**Fig. 3**). As ALS-linked variants  
500 R521G and H517Q translocate further into the cytoplasm under Glu<sup>excito</sup> (**Fig. 3**), we predict these  
501 and other variants with impaired binding to nuclear import factors will accumulate in the cytoplasm  
502 under conditions of chronic stress *in vivo*<sup>41,59</sup>. Moreover, chronic stress may result in nuclear  
503 depletion and cytoplasmic aggregation of wild-type FUS and TDP-43 in sporadic cases as  
504 well<sup>19,20</sup>. We propose a model whereby FUS and related RBPs play a functional role in response  
505 to normal stimulation and moderate degrees of stress, but that excessive or chronic stress  
506 severely disrupts their nucleocytoplasmic equilibrium and contributes to disease pathology (**Fig.**  
507 **8**).

508

## 509 Acknowledgments

510 We are thankful to Drs. Kensuke Futai (University of Massachusetts Medical School; UMMS) and  
511 Miguel Sena-Esteves (UMMS) for sharing reagents and advice, Dr. Martin Hetzer (Salk Institute)  
512 for providing the NLS-tdTomato-NES construct and all the members of the Bosco and Landers

## Excitotoxicity induces nuclear egress of FUS/TLS

513 labs for their valuable input. We are grateful to the following funding sources: US National  
514 Institutes of Health / National Institute on Neurological Disorders and Stroke R21NS091860 (DAB)  
515 and R01 NS078145 (DAB); ALS Association 18-IIA-418 (CF); Zelda Haidek Memorial Scholarship  
516 from UMMS (MT).

517

518 The authors declare no conflict of interest.

519

520 Supplementary information is available at *Cell Death and Differentiation's* website.

521

## 522 **References**

- 523 1 Van Den Bosch L, Van Damme P, Bogaert E, Robberecht W. The role of excitotoxicity in the  
524 pathogenesis of amyotrophic lateral sclerosis. *Biochim Biophys Acta* 2006; **1762**: 1068–  
525 1082.
- 526 2 Starr A, Sattler R. Synaptic dysfunction and altered excitability in C9ORF72 ALS/FTD.  
527 *Brain Research* 2018; **1693**: 98–108.
- 528 3 Fogarty MJ. Driven to decay: Excitability and synaptic abnormalities in amyotrophic lateral  
529 sclerosis. *Brain Research Bulletin* 2018; **140**: 318–333.
- 530 4 Fiszman ML, Ricart KC, Latini A, Rodríguez G, Sica REP. In vitro neurotoxic properties and  
531 excitatory aminoacids concentration in the cerebrospinal fluid of amyotrophic lateral  
532 sclerosis patients. Relationship with the degree of certainty of disease diagnoses. *Acta*  
533 *Neurol Scand* 2010; **121**: 120–126.
- 534 5 Spreux-Varoquaux O, Bensimon G, Lacomblez L, Salachas F, Pradat PF, Le Forestier N *et*  
535 *al.* Glutamate levels in cerebrospinal fluid in amyotrophic lateral sclerosis: a reappraisal

## Excitotoxicity induces nuclear egress of FUS/TLS

- 536 using a new HPLC method with coulometric detection in a large cohort of patients. *J Neurol*  
537 *Sci* 2002; **193**: 73–78.
- 538 6 Kawahara Y *et al.* Glutamate receptors: RNA editing and death of motor neurons. *Nature*  
539 2004; **427**: 801–801.
- 540 7 Hideyama T *et al.* Profound downregulation of the RNA editing enzyme ADAR2 in ALS  
541 spinal motor neurons. *Neurobiology of Disease* 2012; **45**: 1121–1128.
- 542 8 Van Damme P *et al.* Astrocytes regulate GluR2 expression in motor neurons and their  
543 vulnerability to excitotoxicity. *Proc Natl Acad Sci USA* 2007; **104**: 14825–14830.
- 544 9 Mitchell J *et al.* Familial amyotrophic lateral sclerosis is associated with a mutation in D-  
545 amino acid oxidase. *Proc Natl Acad Sci USA* 2010; **107**: 7556–7561.
- 546 10 Cheah BC, Vucic S, Krishnan AV, Kiernan MC. Riluzole, neuroprotection and amyotrophic  
547 lateral sclerosis. *Curr Med Chem* 2010; **17**: 1942–1199.
- 548 11 Brown RH, Al-Chalabi A. Amyotrophic Lateral Sclerosis. *N Engl J Med* 2017; **377**: 162–  
549 172.
- 550 12 Sama RRRK *et al.* FUS/TLS assembles into stress granules and is a prosurvival factor  
551 during hyperosmolar stress. *J Cell Physiol* 2013; **228**: 2222–2231.
- 552 13 Dewey CM *et al.* TDP-43 is directed to stress granules by sorbitol, a novel physiological  
553 osmotic and oxidative stressor. *Mol Cell Biol* 2011; **31**: 1098–1108.
- 554 14 van Oordt WH *et al.* The MKK3/6-p38–signaling cascade alters the subcellular distribution  
555 of hnRNP A1 and modulates alternative splicing regulation. *J Cell Biol* 2000; **149**: 307-316.

## Excitotoxicity induces nuclear egress of FUS/TLS

- 556 15 Sama R, Ward CL, Bosco DA. Functions of FUS/TLS From DNA Repair to Stress  
557 Response: Implications for ALS. *ASN Neuro* 2014; **6**: 1-18.
- 558 16 Kwiatkowski TJ *et al.* Mutations in the FUS/TLS gene on chromosome 16 cause familial  
559 amyotrophic lateral sclerosis. *Science* 2009; **323**: 1205–1208.
- 560 17 Vance C *et al.* Mutations in FUS, an RNA processing protein, cause familial amyotrophic  
561 lateral sclerosis type 6. *Science* 2009; **323**: 1208–1211.
- 562 18 Neumann M *et al.* A new subtype of frontotemporal lobar degeneration with FUS  
563 pathology. *Brain* 2009; **132**: 2922–2931.
- 564 19 Keller BA, Volkening K, Droppelmann CA, Ang L-C, Rademakers R, Strong MJ. Co-  
565 aggregation of RNA binding proteins in ALS spinal motor neurons: evidence of a common  
566 pathogenic mechanism. *Acta Neuropathol* 2012; **124**: 733–747.
- 567 20 Deng H-X *et al.* FUS-immunoreactive inclusions are a common feature in sporadic and  
568 non-SOD1 familial amyotrophic lateral sclerosis. *Ann Neurol* 2010; **67**: 739–748.
- 569 21 Boyd JD *et al.* A high-content screen identifies novel compounds that inhibit stress-induced  
570 TDP-43 cellular aggregation and associated cytotoxicity. *J Biomol Screen* 2014; **19**: 44–56.
- 571 22 Xu G *et al.* Identification of proteins sensitive to thermal stress in human neuroblastoma  
572 and glioma cell lines. *PLoS ONE* 2012; **7**: e49021.
- 573 23 Kahl A *et al.* Cerebral ischemia induces the aggregation of proteins linked to  
574 neurodegenerative diseases. *Sci Rep* 2018; **8**: 2701.
- 575 24 Colombrita C *et al.* TDP-43 is recruited to stress granules in conditions of oxidative insult. *J*  
576 *Neurochem* 2009; **111**: 1051–1061.

## Excitotoxicity induces nuclear egress of FUS/TLS

- 577 25 McDonald KK *et al.* TAR DNA-binding protein 43 (TDP-43) regulates stress granule  
578 dynamics via differential regulation of G3BP and TIA-1. *Hum Mol Gen* 2011; **20**: 1400–  
579 1410.
- 580 26 Bosco DA *et al.* Mutant FUS proteins that cause amyotrophic lateral sclerosis incorporate  
581 into stress granules. *Hum Mol Gen* 2010; **19**: 4160–4175.
- 582 27 Ito D, Hatano M, Suzuki N. RNA binding proteins and the pathological cascade in ALS/FTD  
583 neurodegeneration. *Sci Transl Med* 2017; **9**: eaah5436.
- 584 28 Schubert D, Piasecki D. Oxidative glutamate toxicity can be a component of the  
585 excitotoxicity cascade. *J Neurosci* 2001; **21**: 7455–7462.
- 586 29 Lattante S, Rouleau GA, Kabashi E. TARDBP and FUS mutations associated with  
587 amyotrophic lateral sclerosis: summary and update. *Hum Mutat* 2013; **34**: 812–826.
- 588 30 Ederle H *et al.* Nuclear egress of TDP-43 and FUS occurs independently of Exportin-  
589 1/CRM1. *Sci Rep* 2018; **8**: 7084.
- 590 31 Kino Y *et al.* Intracellular localization and splicing regulation of FUS/TLS are variably  
591 affected by amyotrophic lateral sclerosis-linked mutations. *Nucleic Acids Res* 2011; **39**:  
592 2781–2798.
- 593 32 Grima JC, Daigle JG, Arbez N, Cunningham KC. Mutant Huntingtin Disrupts the Nuclear  
594 Pore Complex. *Neuron* 2017; **1**: 93-107.
- 595 33 Hatch EM, Fischer AH, Deerinck TJ, Hetzer MW. Catastrophic nuclear envelope collapse  
596 in cancer cell micronuclei. *Cell* 2013; **154**: 47–60.



## Excitotoxicity induces nuclear egress of FUS/TLS

- 597 34 Kim HJ, Taylor JP. Lost in Transportation: Nucleocytoplasmic Transport Defects in ALS  
598 and Other Neurodegenerative Diseases. *Neuron* 2017; **96**: 285–297.
- 599 35 Fryer HJ, Knox RJ, Strittmatter SM, Kalb RG. Excitotoxic death of a subset of embryonic  
600 rat motor neurons in vitro. *J Neurochem* 1999; **72**: 500–513.
- 601 36 Rose CR *et al.* Astroglial Glutamate Signaling and Uptake in the Hippocampus. *Front Mol*  
602 *Neurosci* 2017; **10**: 451.
- 603 37 Kedersha N, Ivanov P, Anderson P. Stress granules and cell signaling: more than just a  
604 passing phase? *Trends Biochem Sci* 2013; **38**: 494–506.
- 605 38 Holcik M, Sonenberg N. Translational control in stress and apoptosis. *Nat Rev Mol Cell Biol*  
606 2005; **6**: 318–327.
- 607 39 Murakami T *et al.* ALS/FTD Mutation-Induced Phase Transition of FUS Liquid Droplets and  
608 Reversible Hydrogels into Irreversible Hydrogels Impairs RNP Granule Function. *Neuron*  
609 2015; **88**: 678–690.
- 610 40 Yasuda K *et al.* The RNA-binding protein Fus directs translation of localized mRNAs in  
611 APC-RNP granules. *J Cell Biol* 2013; **203**: 737–746.
- 612 41 Dormann D *et al.* ALS-associated fused in sarcoma (FUS) mutations disrupt Transportin-  
613 mediated nuclear import. *EMBO J* 2010; **29**: 2841–2857.
- 614 42 Gal J *et al.* Nuclear localization sequence of FUS and induction of stress granules by ALS  
615 mutants. *Neurobiol Aging* 2011; **32**: 2323.e27–40.
- 616 43 Schmidt EK, Clavarino G, Ceppi M, Pierre P. SUnSET, a nonradioactive method to monitor  
617 protein synthesis. *Nat Methods* 2009; **6**: 275–277.

## Excitotoxicity induces nuclear egress of FUS/TLS

- 618 44 Holt CE, Schuman EM. The central dogma decentralized: new perspectives on RNA  
619 function and local translation in neurons. *Neuron* 2013; **80**: 648–657.
- 620 45 Lagier-Tourenne C *et al.* Divergent roles of ALS-linked proteins FUS/TLS and TDP-43  
621 intersect in processing long pre-mRNAs. *Nat Neurosci* 2012; **15**: 1488–1497.
- 622 46 Gascon E *et al.* Alterations in microRNA-124 and AMPA receptors contribute to social  
623 behavioral deficits in frontotemporal dementia. *Nature Medicine* 2014; **20**: 1444–1451.
- 624 47 Ju W *et al.* Activity-dependent regulation of dendritic synthesis and trafficking of AMPA  
625 receptors. *Nat Neurosci* 2004; **7**: 244–253.
- 626 48 Ward CL *et al.* A loss of FUS/TLS function leads to impaired cellular proliferation. *Cell*  
627 *Death Dis* 2014; **5**: e1572.
- 628 49 Plaitakis A, Constantakakis E. Altered metabolism of excitatory amino acids, N-acetyl-  
629 aspartate and N-acetyl-aspartylglutamate in amyotrophic lateral sclerosis. *Brain Research*  
630 *Bulletin* 1993.
- 631 50 Rothstein JD *et al.* Abnormal excitatory amino acid metabolism in amyotrophic lateral  
632 sclerosis. *Ann Neurol* 1990; **28**: 18–25.
- 633 51 Kia A, McAvoy K, Krishnamurthy K, Trotti D, Pasinelli P. Astrocytes expressing ALS-linked  
634 mutant FUS induce motor neuron death through release of tumor necrosis factor-alpha.  
635 *Glia* 2018; **66**: 1016–1033.
- 636 52 Fujii R *et al.* The RNA binding protein TLS is translocated to dendritic spines by mGluR5  
637 activation and regulates spine morphology. *Curr Biol* 2005; **15**: 587–593.

## Excitotoxicity induces nuclear egress of FUS/TLS

- 638 53 Takuma H, Kwak S, Yoshizawa T, Kanazawa I. Reduction of GluR2 RNA editing, a  
639 molecular change that increases calcium influx through AMPA receptors, selective in the  
640 spinal ventral gray of patients with amyotrophic lateral sclerosis. *Ann Neurol* 1999; **46**:  
641 806–815.
- 642 54 Ling S-C. Synaptic Paths to Neurodegeneration: The Emerging Role of TDP-43 and FUS in  
643 Synaptic Functions. *Neural Plast* 2018; **2018**: 8413496.
- 644 55 Udagawa T *et al.* FUS regulates AMPA receptor function and FTLD/ALS-associated  
645 behaviour via GluA1 mRNA stabilization. *Nat Commun* 2015; **6**: 7098.
- 646 56 Yokoi S *et al.* 3'UTR Length-Dependent Control of SynGAP Isoform  $\alpha 2$  mRNA by FUS and  
647 ELAV-like Proteins Promotes Dendritic Spine Maturation and Cognitive Function. *Cell Rep*  
648 2017; **20**: 3071–3084.
- 649 57 Archbold HC *et al.* TDP43 nuclear export and neurodegeneration in models of amyotrophic  
650 lateral sclerosis and frontotemporal dementia. *Sci Rep* 2018; **8**: 4606.
- 651 58 Rhoads SN, Monahan ZT, Yee DS, Shewmaker FP. The Role of Post-Translational  
652 Modifications on Prion-Like Aggregation and Liquid-Phase Separation of FUS. *Int J Mol Sci*  
653 2018; **19**. E886
- 654 59 Kodiha M, Chu A, Matusiewicz N, Stochaj U. Multiple mechanisms promote the inhibition of  
655 classical nuclear import upon exposure to severe oxidative stress. *Cell Death Differ* 2004;  
656 **11**: 862–874.
- 657 60 Bano D *et al.* Alteration of the nuclear pore complex in Ca<sup>(2+)</sup>-mediated cell death. *Cell*  
658 *Death Differ* 2010; **17**: 119–133.

## Excitotoxicity induces nuclear egress of FUS/TLS

- 659 61 Yasuda Y, Miyamoto Y, Saiwaki T, Yoneda Y. Mechanism of the stress-induced collapse of  
660 the Ran distribution. *Exp Cell Res* 2006; **312**: 512–520.
- 661 62 Zhang K *et al.* Stress Granule Assembly Disrupts Nucleocytoplasmic Transport. *Cell* 2018;  
662 **173**: 958-971.e17
- 663 63 Kelley JB, Paschal BM. Hyperosmotic stress signaling to the nucleus disrupts the Ran  
664 gradient and the production of RanGTP. *Mol Biol Cell* 2007; **18**: 4365–4376.
- 665 64 Sugiyama K *et al.* Calpain-Dependent Degradation of Nucleoporins Contributes to Motor  
666 Neuron Death in a Mouse Model of Chronic Excitotoxicity. *J Neurosci* 2017; **37**: 8830–  
667 8844.
- 668 65 Li N, Lagier-Tourenne C. Nuclear pores: the gate to neurodegeneration. *Nat Neurosci*  
669 2018; **21**: 156–158.
- 670 66 Haines JD *et al.* Nuclear export inhibitors avert progression in preclinical models of  
671 inflammatory demyelination. *Nat Neurosci* 2015; **18**: 511–520.
- 672 67 Wainger BJ *et al.* Intrinsic Membrane Hyperexcitability of Amyotrophic Lateral Sclerosis  
673 Patient-Derived Motor Neurons. *Cell Rep* 2014; **7**: 1–11.
- 674 68 Sama RRRK *et al.* ALS-linked FUS exerts a gain of toxic function involving aberrant p38  
675 MAPK activation. *Sci Rep* 2017; **7**: 1205.
- 676 69 Sena-Esteves M, Tebbets JC, Steffens S, Crombleholme T, Flake AW. Optimized large-  
677 scale production of high titer lentivirus vector pseudotypes. *J Virol Methods* 2004; **122**:  
678 131–139.

## Excitotoxicity induces nuclear egress of FUS/TLS

679 70 Baron DM *et al.* Amyotrophic lateral sclerosis-linked FUS/TLS alters stress granule  
680 assembly and dynamics. *Molecular Neurodegeneration* 2013; **8**: 30.

681 71 Cajigas IJ *et al.* The local transcriptome in the synaptic neuropil revealed by deep  
682 sequencing and high-resolution imaging. *Neuron* 2012; **74**: 453–466.

## 683 Figure Legends

684 **Figure 1. Endogenous FUS robustly translocates to the cytoplasm in response to**  
685 **excitotoxic stress. (A)** DIV 14-16 primary cortical neurons were bath treated with 10 $\mu$ M  
686 glutamate (Glu<sup>excito</sup>) for 10 minutes, after which the glutamate-containing media was 'washed out'  
687 and replaced with cultured neuronal media for an additional 30 minutes. **(B-E)**  
688 Immunofluorescence and confocal microscopy revealed the cellular localization of FUS, TDP-43,  
689 hnRNPA1 and TAF15 (green) in the absence and presence of Glu<sup>excito</sup>. Endogenous RBP staining  
690 (green) visualized by a 16-color intensity map (Int) further demonstrates the cytoplasmic presence  
691 of these proteins. Neurons and dendrites were identified with anti-MAP2 staining (red), and nuclei  
692 with DAPI (blue). Scale bars = 10 $\mu$ m. **(F-I)** Quantification of the cytoplasmic to nuclear ratio (C:N)  
693 from (B-E). A significant nuclear egress of FUS (F), TDP-43 (G) and hnRNPA1 (H), but not TAF15  
694 (I) was observed following Glu<sup>excito</sup> treatment (n = 3-4 biological replicates). Black squares  
695 represent the C:N ratio of individual cells, and error bars correspond to SEM. Experimental means  
696 were calculated from the average C:N ratio across the individual biological replicates and  
697 significant comparisons were determined with a Student's T-test (\*\*p<0.001, \*p<0.05, n.s. = non-  
698 significant).

699

700 **Figure 2. Cell viability and nuclear membrane integrity are intact under conditions of**  
701 **Glu<sup>excito</sup> that promote FUS translocation. (A)** Following excitotoxic insult, FUS egress and  
702 cytoskeletal rearrangements were detected by anti-FUS (green) and -MAP2 (red) staining,  
703 respectively. Scale bar = 40 $\mu$ m. **(B)** Quantification of (A) revealed a dependence of FUS

### Excitotoxicity induces nuclear egress of FUS/TLS

704 translocation on the dose of glutamate in MAP2-positive neurons (one-way ANOVA and Tukey's  
705 post-hoc test; \*\*\* $p < 0.001$ , \* $p < 0.05$ ;  $n = 3$  biological replicates). **(C)** Increased dendritic FUS  
706 staining (green) was observed by confocal microscopy following excitotoxic stress. Dendrites  
707 were labeled with anti-MAP2 (red). Scale bar =  $10\mu\text{m}$ . **(D)** Quantification of (C). Black squares  
708 represent the intensity of dendritic FUS staining per cell. Means represent the average of  $n = 4$   
709 biological replicates (Student's T-test; \* $p < 0.05$ ) normalized to the control ( $\text{Glu}^-$ ). **(E)** Cytotoxicity  
710 induced by  $\text{Glu}^{\text{excito}}$  was assessed after the washout period (Fig. 1A) with the LDH assay. In  
711 contrast to the positive control (neurons treated with lysis buffer; lysed neurons), membrane  
712 permeabilization was not detected for neurons exposed to  $\text{Glu}^{\text{excito}}$ . Neurons cultured in the  
713 absence of  $\text{Glu}^{\text{excito}}$  ( $\text{Glu}^-$ ) served as a negative control. Wells containing only primary neuron  
714 cultured medium (PCM) served as a background control. Results reflect  $n = 3$  biological replicates  
715 analyzed with a one-way ANOVA and Tukey's post-hoc test (\*\*\*\* $p < 0.0001$ , n.s. = non-significant).  
716 **(F)** Immunofluorescence with anti-Lamin A/C staining (red) and confocal microscopy revealed the  
717 nuclear envelope was thickened yet still intact within neurons exhibiting translocated FUS (green)  
718 after  $\text{Glu}^{\text{excito}}$  exposure. The time point is the same as (E). Scale bar =  $25\mu\text{m}$ . For (B), (D) and  
719 (E), error bars represent SEM.

720

721 **Figure 3. The effect of  $\text{Glu}^{\text{excito}}$  on ALS-linked FUS variants.** **(A)** Cortical neurons transfected  
722 with the indicated FLAG-HA-tagged FUS variants were exposed to  $\text{Glu}^{\text{excito}}$  and nuclear FLAG-  
723 HA-FUS egress was assessed by immunofluorescence. Exogenous FUS was detected using an  
724 anti-HA antibody (green) within MAP2-positive neurons (red). Nuclei were stained with DAPI  
725 (blue). Scale bar =  $10\mu\text{m}$ . **(B)** Quantification of the C:N ratio for FLAG-HA-FUS variants in (A)  
726 revealed a significant shift in equilibrium towards the cytoplasm for FLAG-HA-FUS WT, H517Q  
727 and R521G, but not R495X, in response to stress (Student's T-test; \*\*\* $p < 0.001$ , \* $p < 0.05$ , n.s. =  
728 not significant,  $n=3-5$  biological experiments). Black squares represent individual, cellular C:N  
729 measurements. Error bars represent SEM.

## Excitotoxicity induces nuclear egress of FUS/TLS

730

731 **Figure 4. Nucleocytoplasmic transport is disrupted by Glu<sup>excito</sup>.** (A-C) Cortical neurons  
732 expressing the shuttling reporter, NLS-tdTomato-NES, were treated with or without 500 nM of the  
733 exportin 1 inhibitor KPT-330 (KPT) prior to Glu<sup>excito</sup> exposure. Neurons were identified with anti-  
734 MAP2 staining (A; red). The percentage of MAP2-positive cells expressing cytoplasmic NLS-  
735 tdTomato-NES (A; white) or FUS (A; green) was quantified in (B) and (C), respectively (n = 3  
736 biological experiments). KPT-330 effectively prevents NLS-tdTomato-NES from localizing to the  
737 cytoplasm in the absence of stress (Glu<sup>-</sup>; A and B, two-way ANOVA and Tukey's post-hoc test;  
738 \*\*\*\*p<0.0001), as expected. Conversely, in the presence of stress (Glu<sup>excito</sup>), KPT-330 fails to  
739 restrict NLS-tdTomato-NES and FUS localization to the nucleus, indicative of dysregulated  
740 nucleocytoplasmic transport (in B and C, compare Glu<sup>-</sup> to Glu<sup>excito</sup> in the presence of KPT-330,  
741 two-way ANOVA and Tukey's post-hoc test; \*\*\*\*p<0.0001, n.s. = non-significant). The localization  
742 of nuclear transport factors CRM1 (D, E) and RAN (F, G) were significantly altered under  
743 conditions of Glu<sup>excito</sup> in MAP2-positive neurons (red); CRM1 and RAN (green in D and E,  
744 respectively) were depleted from the nucleus (DAPI; blue) and exhibited a perinuclear  
745 accumulation. The percentage of neurons with CRM1 or RAN mislocalization were quantified in  
746 (E) and (G), respectively (Student's T-test; \*\*\*\*p<0.0001, \*\*p<0.01; n = 3 biological replicates).  
747 Error bars represent SEM. Scale bars = 10µm.

748

749 **Figure 5. Calcium is necessary and sufficient for FUS translocation in primary cortical and**  
750 **motor neurons.** (A) Reducing extracellular calcium levels with 2mM EGTA attenuates FUS  
751 egress (green) in MAP2-positive neurons (red) following excitotoxic insult. Nuclei were stained  
752 with DAPI (blue). (B) Quantification of confocal microscopy findings in (A) confirmed the effect of  
753 EGTA treatment (two-way ANOVA and Tukey's post-hoc test; \*\*\*\*p<0.0001; n = 4 biological  
754 replicates). (C,D) Application of 10µM of the calcium ionophore, Ionomycin (Iono), for 1 hour  
755 induced FUS translocation relative to the dimethyl sulfoxide control (Student's T-test;

## Excitotoxicity induces nuclear egress of FUS/TLS

756 \*\*\*\* $p < 0.0001$ ;  $n = 3$  biological replicates). **(E,F)** FUS translocation induced by hyperosmotic stress  
757 (HOS) was not significantly attenuated by EGTA treatment (two-way ANOVA and Tukey's post-  
758 hoc test; \*\*\*\* $p < 0.0001$ , n.s. = non-significant;  $n = 3$  biological replicates). **(G,H)** Primary motor  
759 neurons treated with Ionomycin (Iono) as in (C,D) also exhibit FUS egress (green) and a  
760 significant increase in FUS C:N ratio (Student's T-test, \*\* $p < 0.01$ ,  $n = 3$  biological replicates). Motor  
761 neurons were identified using the motor neuron marker, SMI-32 (red) and nuclei were stained  
762 with DAPI (blue). **(I)** A 10-minute treatment of  $300\mu\text{M}$  kainic acid followed by a 1-hour recovery  
763 induced FUS egress in primary motor neurons. A near depletion of FUS from the nucleus was  
764 observed for a subset of motor neurons (kainic acid, *left*). **(J)** Kainic acid (KA) induced FUS egress  
765 was statistically significant relative to the washout control (Student's T-test, \*\* $p < 0.01$ ,  $n = 3$   
766 biological replicates). **(I, J)** Black squares indicate individual cell measurements normalized to the  
767 average of the replicate control. Accordingly, means represent the normalized average of  $n = 3$   
768 biological replicates. Error bars represent SEM. Scale bars =  $10\mu\text{m}$ .

769

770 **Figure 6. FUS translocation coincides with translational repression in neurons exposed to**  
771 **Glu<sup>excito</sup>.** **(A)** Cellular translation in neurons was monitored by pulse-treatment and incorporation  
772 of the small molecule, puromycin, into nascent peptides during excitotoxic and/or cycloheximide  
773 treatment (CHX; inhibitor of protein translation). **(B)** The localization of FUS (green) and  
774 incorporated puromycin (magenta) in MAP2-positive neurons (red) was assessed by  
775 immunofluorescence. Relative to Glu<sup>-</sup>, protein translation was reduced upon application of  
776 cycloheximide or Glu<sup>excito</sup>, however cycloheximide did not induce FUS egress from nuclei (DAPI;  
777 blue). The white arrowhead marks a neuron with predominately nuclear FUS and high puromycin  
778 staining under Glu<sup>excito</sup>, whereas most neurons under this condition have cytoplasmic FUS and  
779 reduced puromycin staining. White boxes denote higher magnification details (*right*) to highlight  
780 neurons with representative levels of translation, as observed by anti-puromycin staining. **(C, D)**  
781 Western and densitometry analysis of puromycin incorporation confirms a significant reduction in



## Excitotoxicity induces nuclear egress of FUS/TLS

782 translation following cycloheximide or Glu<sup>excito</sup> treatment relative to Glu<sup>-</sup> (one-way ANOVA and  
783 Tukey's post-hoc test, \*\*\*\*p<0.0001, n = 3 biological replicates). Puromycin signal was normalized  
784 to total protein levels. Scale bars = 10µm. Error bars represent SEM.

785

786 **Figure 7. Elevation of Gria2 mRNA in dendrites following Glu<sup>excito</sup> requires FUS expression.**

787 **(A)** Lentivirus expressing a GFP reporter and scrambled control shRNA (shSC) or shRNA against  
788 FUS (shFUS1, shFUS2) were used to reduce FUS levels in neurons in order to evaluate Gria2  
789 mRNA distribution in soma and dendrites. **(B, C)** Following excitotoxic insult, the density of Gria2  
790 was increased in both **(B)** soma and **(C)** dendrites of shSC transduced neurons; upon FUS  
791 knockdown dendritic Gria2 did not increase following treatment with Glu<sup>excito</sup> (two-way ANOVA  
792 and Dunnett's post-hoc test, \*\*\*\*p<0.0001, \*\*\*p<0.001, \*\*p<0.01, \*p<0.05, n = 3 biological  
793 replicates). Black squares indicate individual cell measurements. Error bars represent SEM. Scale  
794 bars = 10µm. **(D)** Representative images of (B,C). Gria2 mRNA was detected by FISH (white) in  
795 neurons outlined in green (raw images shown in Fig. S4B; image processing described in Fig.  
796 S4C).

797

798 **Figure 8. A model depicting the impact of excitotoxic stress on neuronal homeostasis and**

799 **disease pathogenesis.** Under homeostatic conditions, shuttling RBPs such as FUS are  
800 predominately localized within the nucleus (top). Excitotoxic levels of glutamate (bottom) induce  
801 a massive influx of calcium, which is sufficient to induce the robust nuclear egress of FUS into the  
802 neuronal soma and dendrites. Excitotoxic stress also leads to translational repression, a re-  
803 distribution of nucleocytoplasmic transport factors, and increased levels of Gria2 transcript within  
804 dendrites. The expression of FUS is required for enhanced levels of dendritic Gria2 in response  
805 to excitotoxic stress, implicating an RNA-processing role for FUS under these conditions.  
806 Enhanced levels of edited Gria2 transcript may represent a mechanism to offset the toxic effects  
807 of calcium influx. Prolonged or severe stress could manifest in the pathological aggregation of

## Excitotoxicity induces nuclear egress of FUS/TLS

808 RBPs, including FUS, in neurodegenerative diseases such as ALS and FTD. Aberrant processing  
809 of Gria2 and/or GluR2 can occur through several mechanisms (e.g., expression of mutant FUS in  
810 astrocytes, loss of FUS function due to aggregation, and other means as described in the text),  
811 and contributes to calcium dyshomeostasis during disease.

812

### 813 **Supplementary Figure 1. RBP protein levels do not change in response to Glu<sup>excito</sup>. (A, B)**

814 Western analysis of cortical neurons demonstrate that FUS, TAF15, hnRNPA1 and TDP-43  
815 protein levels do not change in response to Glu<sup>excito</sup>. **(C-F)** This observation was confirmed using  
816 densitometry. For quantification, RBP levels were first normalized to the loading standard,  
817 glyceraldehyde 3-phosphate dehydrogenase (GAPDH), and then the control condition, Glu<sup>-</sup>  
818 (Student's t-test, n.s. = non-significant, n=3 biological replicates). Error bars = SEM.

819

### 820 **Supplementary Figure 2. FMRP retains cytoplasmic localization following excitotoxic**

821 **insult. (A)** Anti-FUS antibody epitopes mapped to the domain structure of human FUS (QGSY =  
822 glycine-serine-tyrosine rich region, GLY = glycine-rich region, RRM = RNA recognition motif,  
823 RGG = arginine-glycine-glycine-rich region, ZF = zinc-finger domain and NLS = nuclear  
824 localization sequence). **(B)** Immunofluorescence staining of endogenous FUS (green) using  
825 antibodies with epitopes described in (A) consistently demonstrates FUS translocation following  
826 treatment with Glu<sup>excito</sup>. **(C)** Confocal analysis of anti-FMRP staining (green) demonstrates that  
827 the cytoplasmic localization of this protein is retained in neurons following excitotoxic stress (n =  
828 2 biological replicates). Neurons were identified using a MAP2 antibody (red) and nuclei with  
829 DAPI (blue). **(D,E)** Quantification of MAP2-positive neurons at 24 hours relative to 30 minutes  
830 shows a significant reduction in neuron number following treatment with 10 but not 1 $\mu$ M glutamate  
831 relative to Glu<sup>-</sup> (one-way ANOVA and Tukey's post-hoc test, \*\*\*p<0.001, n.s. = non-significant, n  
832 = 3 biological replicates). Scale bars = 10 $\mu$ m. Error bars = SEM.

833

## Excitotoxicity induces nuclear egress of FUS/TLS

834 **Supplementary Figure 3. Reduced protein translation following excitotoxic stress is**  
835 **independent of EIF2 $\alpha$ -phosphorylation and FUS levels. (A)** Immunofluorescence staining of  
836 stress granule marker, G3BP1 (red), shows neurons treated sodium arsenite (NaAsO<sub>2</sub>) form  
837 stress granules unlike Glu<sup>excito</sup> or Glu<sup>-</sup> conditions where G3BP1 signal remains diffuse. Scale bar  
838 = 20 $\mu$ m. **(B,C)** Western and densitometry analysis demonstrate a significant increase in EIF2 $\alpha$   
839 phosphorylation (EIF2 $\alpha$ -P) following sodium arsenite treatment (NaAsO<sub>2</sub>) relative to Glu<sup>-</sup> but no  
840 significant change was observed for Glu<sup>excito</sup>. Levels of EIF2 $\alpha$ -P were normalized to total EIF2 $\alpha$   
841 protein and the loading control, GAPDH (one-way ANOVA and Tukey's post-hoc test, \*\*p<0.01,  
842 n = 3 biological replicates). Scale bars = 10 $\mu$ m. Error bars represent SEM. **(D)** Primary neurons  
843 were transduced with shRNAs against mouse FUS (shFUS1, shFUS1) or a scrambled control  
844 (shSC) to induce FUS knockdown. Transduced neurons were identified by expression of a GFP  
845 reporter (white). Immunofluorescence staining of FUS (green) reveals FUS knockdown in  
846 transduced neurons identified using a MAP2 antibody (red). Scale bar = 50 $\mu$ m. **(E, F)** Western  
847 and densitometry analysis confirms FUS knockdown relative to non-transduced (NT) and shSC  
848 conditions. A modest increase in FUS levels was observed upon expression of shSC relative the  
849 loading standard, GAPDH (GAP; n=3; one-way ANOVA and Tukey's Post Hoc test, \*\*\*\*p<0.0001,  
850 \*\*p<0.01; n=3 biological replicates). **(G, H)** Neurons were pulse-chased labelled with puromycin  
851 (Puro; magenta) to assess nascent protein translation in transduced cells (as in B-D). The  
852 intensity of puromycin staining (Puro) for each condition was normalized to the respective  
853 stressed or unstressed non-transduced (NT) control. Scale bar = 10 $\mu$ m. **(I, J)** Quantification of  
854 puromycin (Puro) staining from (G,H) reveals no statistical difference in the somatic levels of  
855 translation following FUS knockdown (shFUS1, shFUS2) relative to shSC (one-way ANOVA and  
856 Dunnett's post-hoc test, n.s. = not significant, n = 3 biological replicates). Error bars = SEM.

857 **Supplementary Figure 4. Steady state GluR2 protein levels are unchanged following**  
858 **Glu<sup>excito</sup>. (A).** Detection of the Gria2 transcript by FISH (green) was confirmed by the absence of

## Excitotoxicity induces nuclear egress of FUS/TLS

859 signal in 'no probe' and 'RNase' controls in MAP2-positive neurons (red). **(B)** Unprocessed images  
860 of Gria2 FISH in neurons represented in **(Fig 7D)**. **(C)** To generate the images used in **(Fig 7D)**,  
861 Gria2 puncta (green) were digitally dilated and converted to white. Images of MAP2 staining used  
862 to indicate neurons and dendrites (red) were converted to binary and used to make a MAP2 mask  
863 subsequently outlined in green. White boxes exemplify approximate somatic (\*) and dendritic (\*\*)  
864 areas used for analysis and depiction in (Fig. 7). **(F, H)** Western and densitometry analysis of  
865 steady-state GluR2 protein levels reveal no statistical difference following Glu<sup>excito</sup> relative to Glu<sup>-</sup>  
866 and normalization to the loading standard, GAPDH (Student's T-test, n.s. = not significant, n = 5  
867 biological replicates). Scale bars = 25µm. Error bars = SEM.

## Excitotoxicity induces nuclear egress of FUS/TLS

Figure 8.

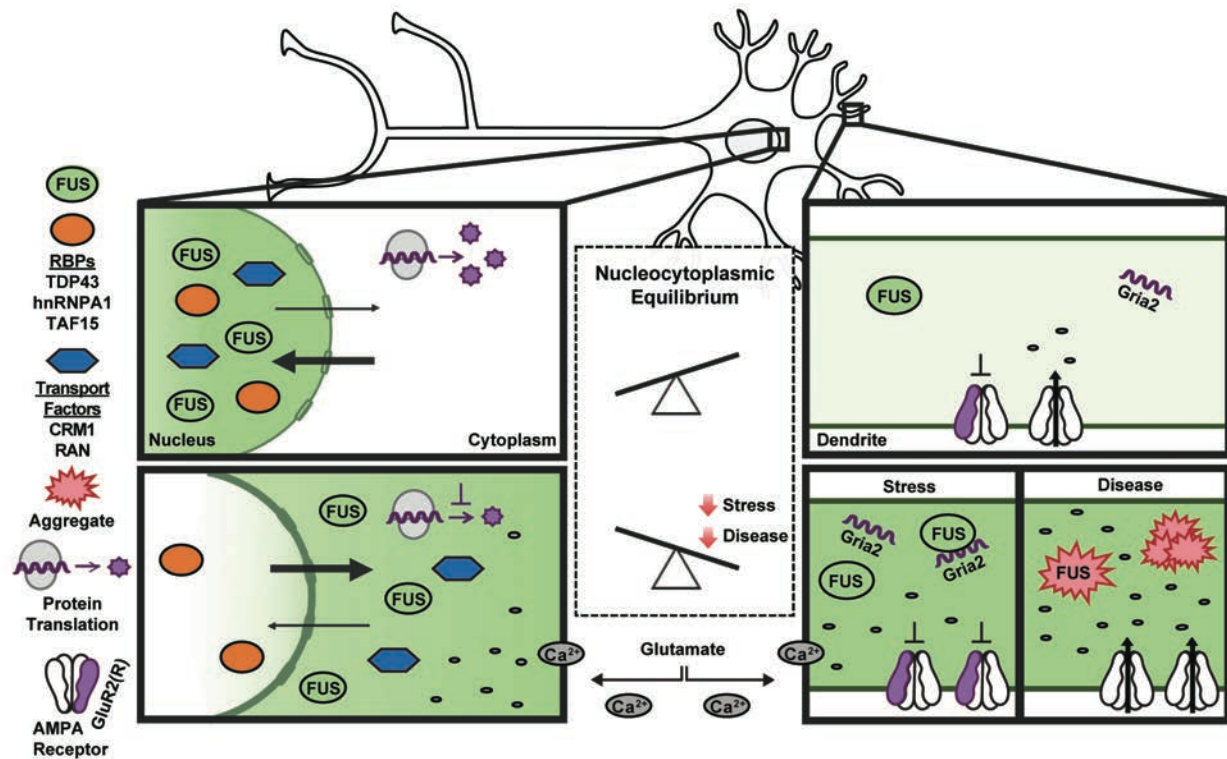

## Excitotoxicity induces nuclear egress of FUS/TLS

Figure 7.

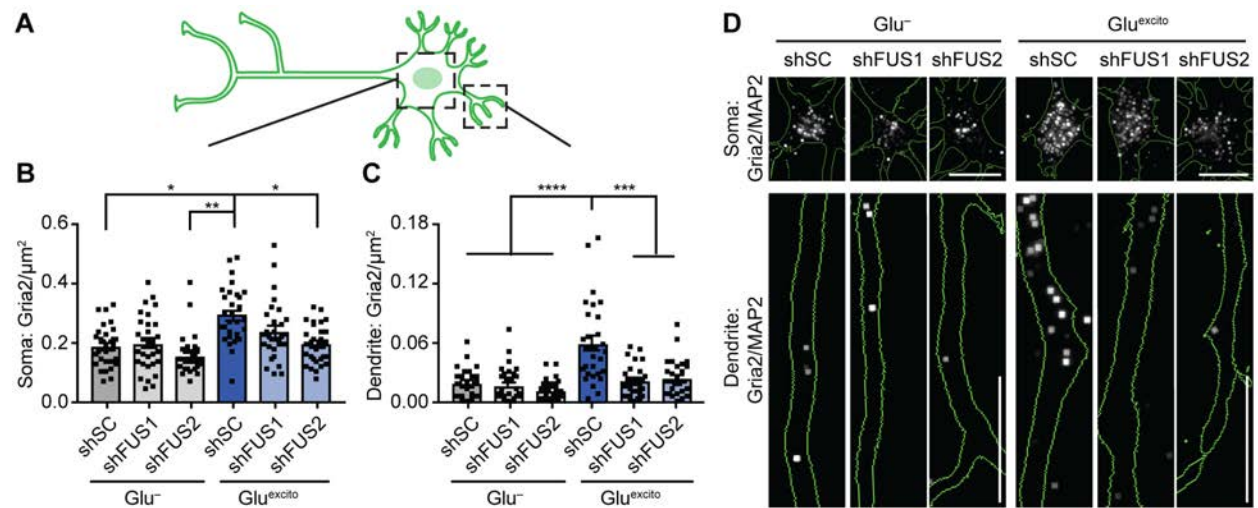

## Excitotoxicity induces nuclear egress of FUS/TLS

Figure 6.

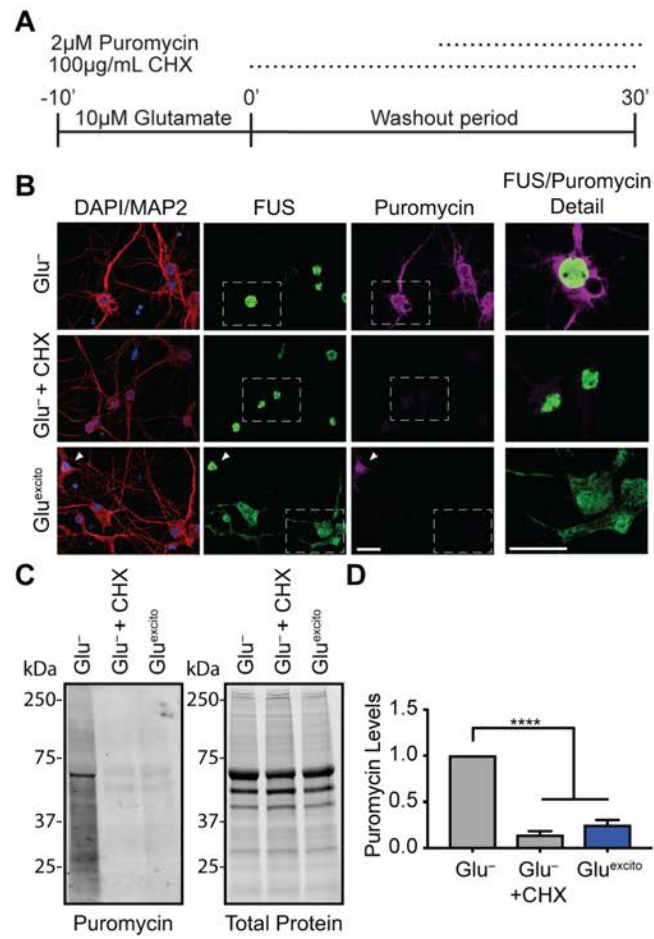

## Excitotoxicity induces nuclear egress of FUS/TLS

Figure 5.

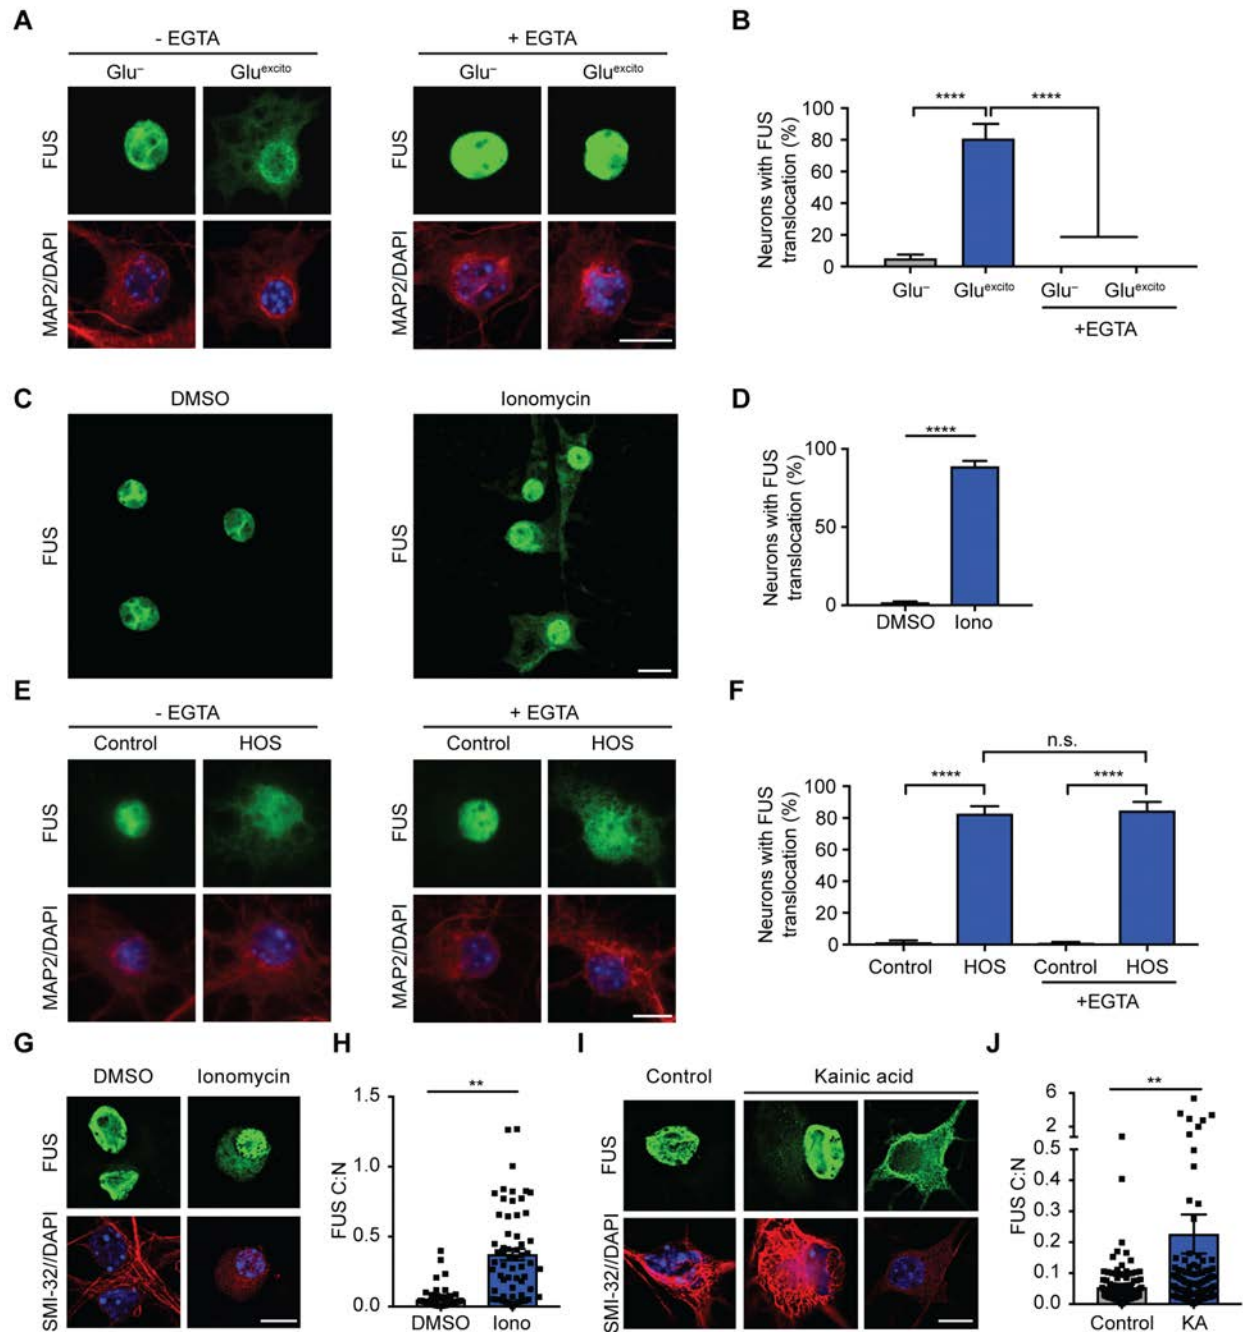



## Excitotoxicity induces nuclear egress of FUS/TLS

Figure 4.

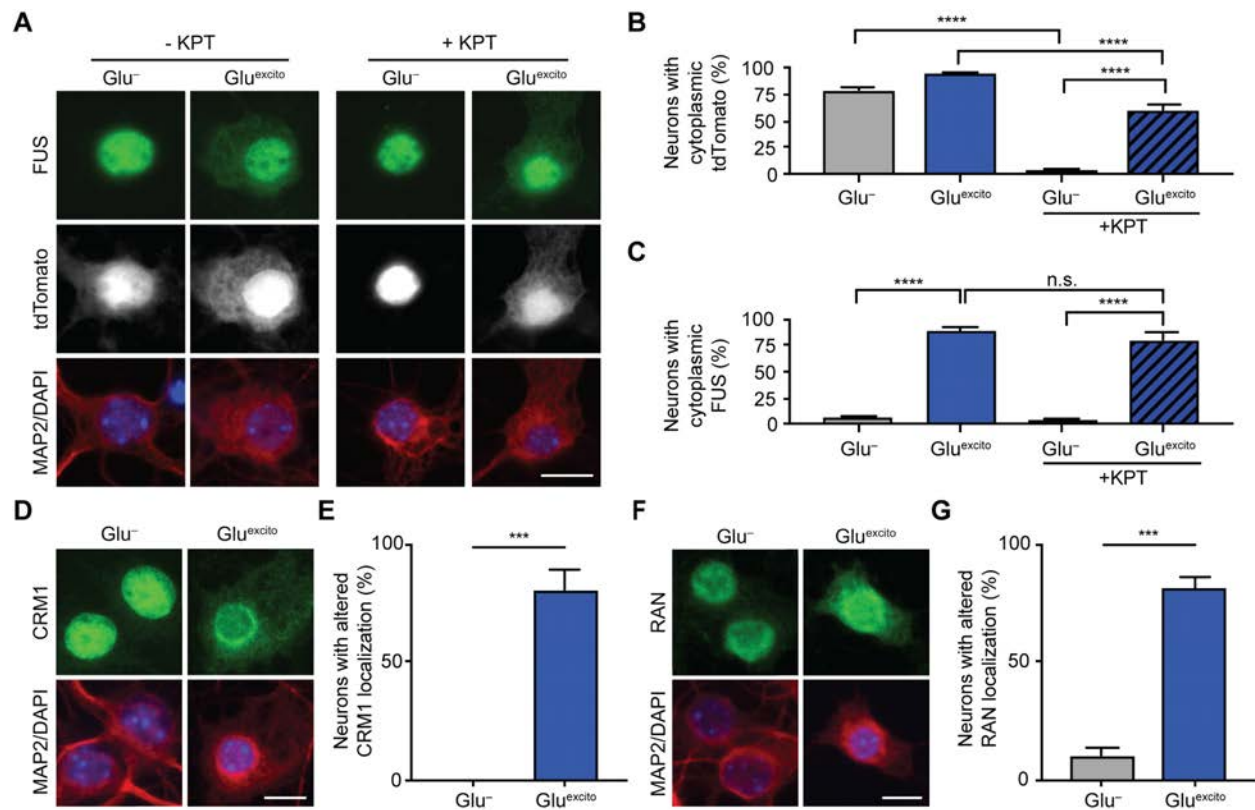

## Excitotoxicity induces nuclear egress of FUS/TLS

Figure 3.

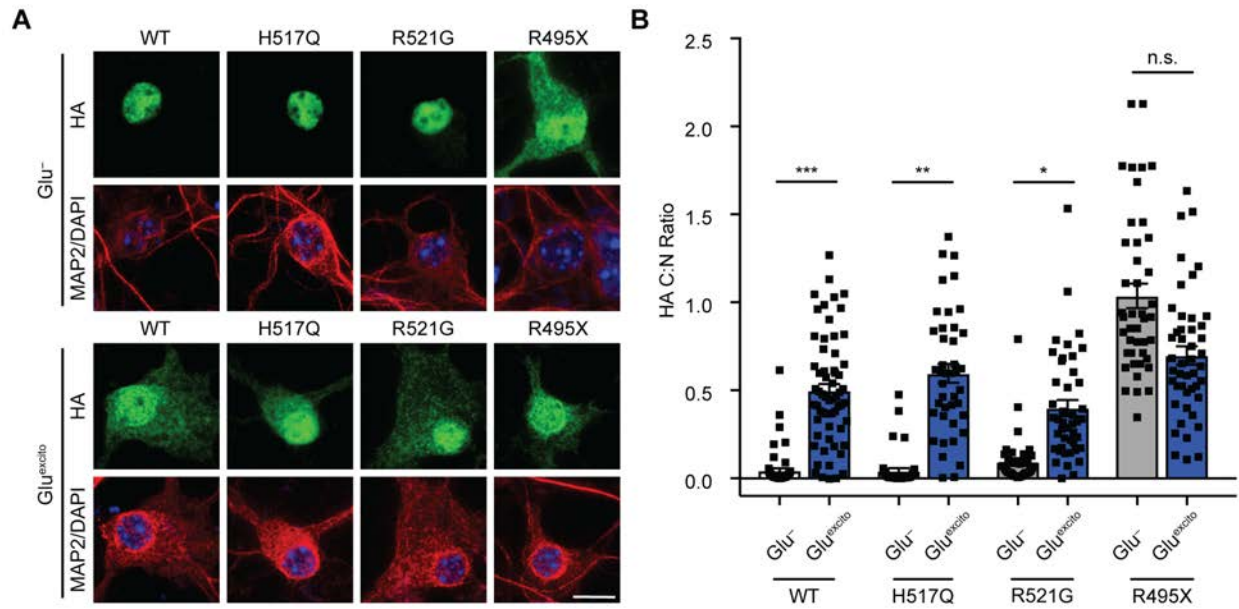

## Excitotoxicity induces nuclear egress of FUS/TLS

Figure 2.

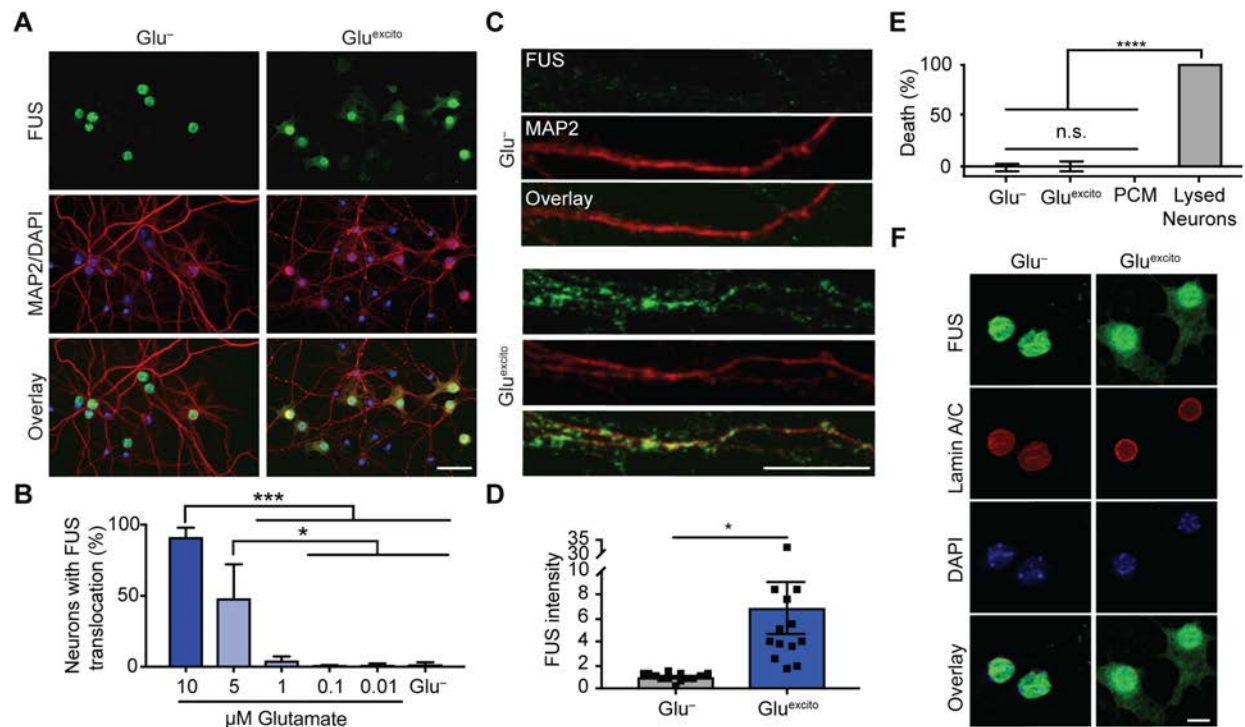

## Excitotoxicity induces nuclear egress of FUS/TLS

Figure 1.

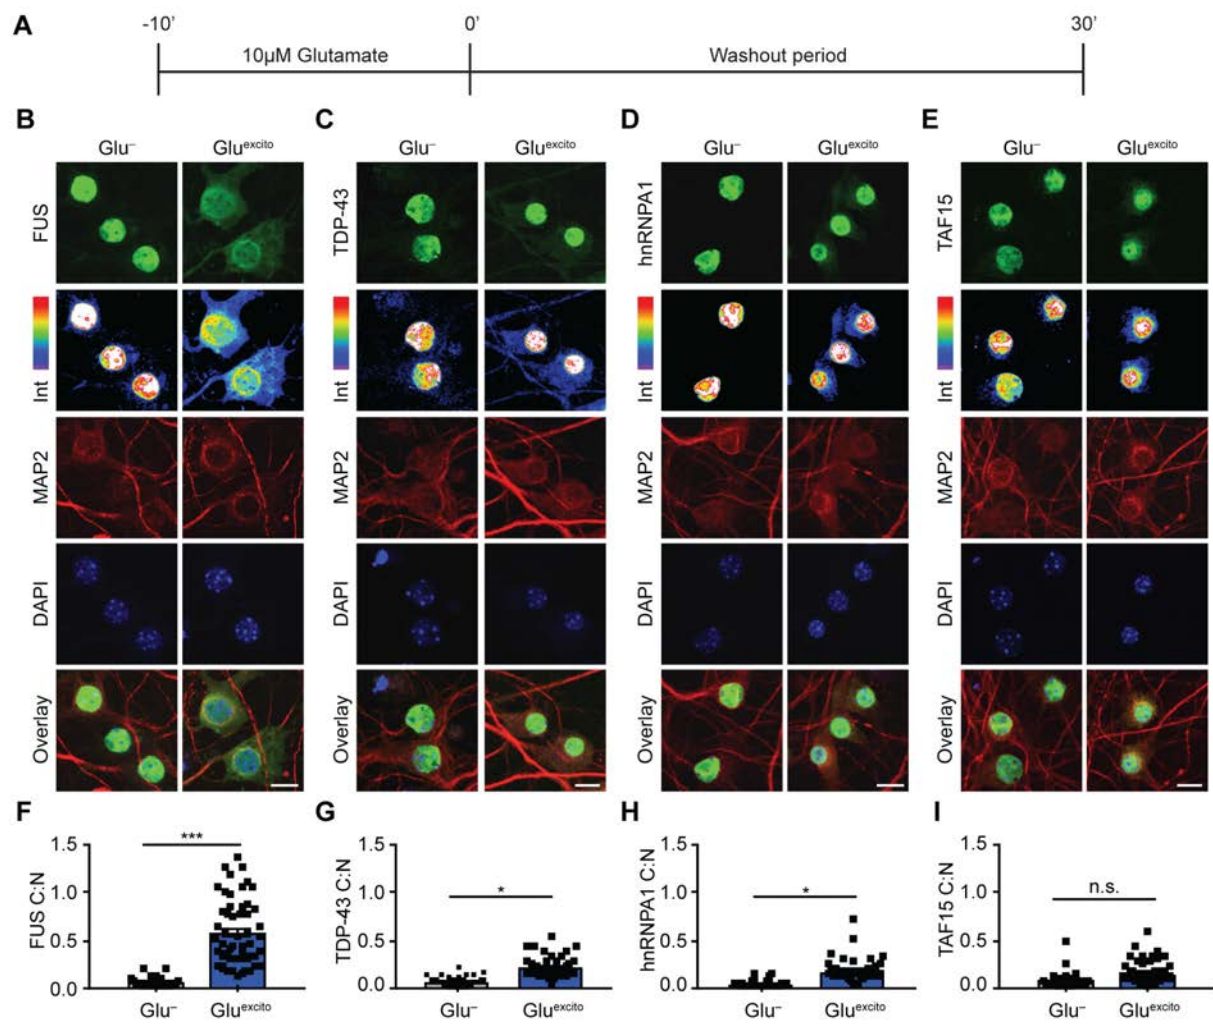

Source: https://www.biorxiv.org/content/10.1101/386870v1.full.pdf
